# Supplementary material for: Genome Sequencing and Comparative Genomics of the Broad Host-Range Pathogen Rhizoctonia solani AG8
Source: PLoS Genet. 2014 May 8;10(5):e1004281. doi: 10.1371/journal.pgen.1004281 (PMC4014442; doi:10.1371/journal.pgen.1004281)
Supplement: Table S5 — Summary of non-coding RNA regions predicted within the R. solani AG8 genome assembly. (A) ncRNA predictions made via Infernal and their genomic coordinates. (B) Summary of Infernal predictions. (C) tRNA predictions made via tRNAScan. (XLSX) [file pgen.1004281.s007.xlsx]

## Sheet: A) Infernal-RFAM
Scaffold ID	RFAM ID	RFAM accession	model type	model start	model end	scaffold start	scaffold end	scaffold strand	truncated match?	pass?	G:C%	bias	score	E-value
Scaffold_1	snoMe18S-Gm1358	RF00533	cm	1	78	6621	6674	+	no	1	0.48	0	20.9	2.1
Scaffold_1	msr	RF00170	cm	1	72	54612	54682	-	no	1	0.41	0	20.5	5
Scaffold_1	snoZ196	RF00134	cm	1	85	72591	72665	-	no	1	0.41	0	21.6	25
Scaffold_1	snoZ278	RF00201	cm	1	115	118225	118292	-	no	1	0.51	0	20.1	2.6
Scaffold_1	S15	RF00114	cm	1	117	125786	125894	+	no	1	0.45	0	21.5	0.16
Scaffold_1	tRNA	RF00005	cm	1	71	274565	274643	-	no	1	0.54	0	46.6	1.8e-07
Scaffold_1	mir-876	RF00935	cm	1	81	289096	289137	+	no	1	0.6	0	32.8	0.0012
Scaffold_1	U7	RF00066	cm	1	63	340262	340341	-	no	1	0.47	0	20.1	0.99
Scaffold_1	CC3513	RF01528	cm	1	173	412040	412195	-	no	1	0.59	0.2	20	4.6
Scaffold_1	GRIK4_3p_UTR	RF01383	cm	1	86	523569	523642	+	no	1	0.66	0	17.5	13
Scaffold_1	CAESAR	RF00172	cm	1	80	542707	542773	+	no	1	0.43	0	20.7	4.7
Scaffold_1	snoZ247	RF00321	cm	1	139	584757	584808	-	no	1	0.46	0	18.6	7.9
Scaffold_1	U4	RF00015	cm	1	139	625668	625855	-	no	1	0.49	0	66.5	1.7e-12
Scaffold_1	CRISPR-DR31	RF01357	cm	1	37	677061	677081	+	no	1	0.43	0	21.7	0.6
Scaffold_1	mir-302	RF00668	cm	1	69	678600	678676	+	no	1	0.4	0	27.1	0.032
Scaffold_1	mir-302	RF00668	cm	1	69	678822	678898	+	no	1	0.38	0	30.4	0.0037
Scaffold_1	sn3071	RF01166	cm	1	77	702755	702823	+	no	1	0.35	0	20.4	2.1
Scaffold_1	tRNA	RF00005	cm	1	71	745262	745345	+	no	1	0.51	0	34.9	0.00029
Scaffold_1	mir-318	RF00818	cm	1	68	811513	811573	+	no	1	0.54	0	20.1	3.2
Scaffold_1	SBWMV1_UPD-PKe	RF01081	cm	1	26	901375	901400	-	no	1	0.38	0	21.4	3.8
Scaffold_1	snoZ267	RF00344	cm	1	73	908207	908243	-	no	1	0.51	0	22.3	1.5
Scaffold_1	MIR815	RF00884	cm	1	81	947600	947669	+	no	1	0.56	0	21.3	2.5
Scaffold_1	GRIK4_3p_UTR	RF01383	cm	1	86	976880	976943	+	no	1	0.58	0	13.2	170
Scaffold_1	tRNA	RF00005	cm	1	71	1081667	1081765	+	no	1	0.53	0	47.7	9.5e-08
Scaffold_1	RF_site1	RF01074	cm	1	40	1099697	1099759	+	no	1	0.63	0	20.1	6.2
Scaffold_1	SNORD111	RF00611	cm	1	89	1141558	1141650	-	no	1	0.35	0	26.2	0.46
Scaffold_10	GRIK4_3p_UTR	RF01383	cm	1	86	747	837	+	no	1	0.62	0	18.3	8
Scaffold_10	TB11Cs4H1	RF01539	cm	1	71	38910	38951	+	no	1	0.57	0	19	11
Scaffold_10	snoZ118	RF00142	cm	1	108	88519	88615	+	no	1	0.48	0	22	3.7
Scaffold_10	nos_TCE	RF00161	cm	1	64	212309	212382	-	no	1	0.51	0	20.4	4
Scaffold_10	snoR17	RF01289	cm	1	110	225304	225407	+	no	1	0.38	0.3	24.6	2.5
Scaffold_10	GRIK4_3p_UTR	RF01383	cm	1	86	253020	253098	-	no	1	0.59	0	12.2	320
Scaffold_10	SNORD34	RF00147	cm	1	81	270571	270650	+	no	1	0.35	0	20.1	15
Scaffold_10	SNORD98	RF00607	cm	1	65	283913	283966	-	no	1	0.44	0	20.2	4.2
Scaffold_10	MIR828	RF01026	cm	1	100	293473	293570	-	no	1	0.39	0	19.4	19
Scaffold_100	CRISPR-DR8	RF01321	cm	1	37	8135	8171	+	no	1	0.49	0	24.7	0.079
Scaffold_100	PK1-TEV_CVMV	RF01102	cm	1	37	11065	11102	-	no	1	0.32	0	21.1	13
Scaffold_100	snR50	RF01190	cm	1	89	64353	64431	-	no	1	0.34	0	20.7	20
Scaffold_101	mir-616	RF00995	cm	1	97	47011	47178	-	no	1	0.39	0	23.4	0.65
Scaffold_101	CRISPR-DR56	RF01369	cm	1	37	47714	47741	+	no	1	0.46	0	21.7	1.7
Scaffold_101	CRISPR-DR32	RF01342	cm	1	37	100188	100222	-	no	1	0.49	0	18.2	38
Scaffold_102	snoZ163	RF00317	cm	1	90	26668	26720	-	no	1	0.43	0	21.3	0.65
Scaffold_102	mir-657	RF00988	cm	1	98	66220	66285	+	no	1	0.55	0	20	2.4
Scaffold_102	mir-136	RF00687	cm	1	83	71541	71589	+	no	1	0.67	0	21.6	2.9
Scaffold_103	CRISPR-DR33	RF01343	cm	1	37	26982	27049	+	no	1	0.43	0	21.4	0.81
Scaffold_103	MIR828	RF01026	cm	1	100	56883	56965	-	no	1	0.37	0	20.9	8
Scaffold_103	TB11Cs4H1	RF01539	cm	1	71	93548	93616	+	no	1	0.42	0	19.6	8.2
Scaffold_103	mir-578	RF00971	cm	1	96	97514	97598	-	no	1	0.49	0	30.9	0.016
Scaffold_103	UPD-PKib	RF01080	cm	1	32	111148	111179	-	no	1	0.5	0	21.3	4.2
Scaffold_104	BMV3_UPD-PK3	RF01113	cm	1	23	69665	69687	+	no	1	0.3	0	20.9	11
Scaffold_104	MIR828	RF01026	cm	1	100	98214	98295	-	no	1	0.37	0	21.2	6.7
Scaffold_105	CRISPR-DR47	RF01360	cm	1	37	52486	52521	-	no	1	0.31	0	21.6	2.8
Scaffold_105	snoZ223	RF00135	cm	1	94	71887	71978	+	no	1	0.39	0	18	24
Scaffold_106	CRISPR-DR28	RF01356	cm	1	24	21558	21591	+	no	1	0.71	0	20.1	9.9
Scaffold_106	MIR1444	RF00956	cm	1	85	24251	24331	-	no	1	0.38	0	21.7	2.3
Scaffold_106	mir-283	RF00747	cm	1	96	28906	28996	+	no	1	0.42	0	22.1	3.5
Scaffold_106	CRISPR-DR28	RF01356	cm	1	24	44442	44501	-	no	1	0.58	0	17.6	40
Scaffold_106	mir-944	RF01024	cm	1	88	89533	89621	+	no	1	0.27	0.4	23.8	0.9
Scaffold_107	CRISPR-DR51	RF01364	cm	1	38	83789	83842	-	no	1	0.41	0	21.8	12
Scaffold_108	mir-944	RF01024	cm	1	88	58176	58278	-	no	1	0.27	1	39	0.00013
Scaffold_108	mir-577	RF01013	cm	1	96	60390	60475	+	no	1	0.31	0	28	0.026
Scaffold_108	snosnR60_Z15	RF00309	cm	1	98	65647	65746	-	no	1	0.33	0	24.9	1.9
Scaffold_108	mir-450	RF00708	cm	8	82	73293	73390	+	no	1	0.26	2.3	28.1	0.23
Scaffold_108	Bacteroides-1	RF01694	cm	1	83	73606	73674	+	no	1	0.43	0	21.9	4.5
Scaffold_108	mir-556	RF00969	cm	1	95	80870	80937	-	no	1	0.31	0	23.5	3.4
Scaffold_108	mir-556	RF00969	cm	1	95	81267	81351	+	no	1	0.35	0	27.7	0.32
Scaffold_108	mir-280	RF00801	cm	1	95	82694	82793	-	no	1	0.32	0	23.2	0.24
Scaffold_108	mir-944	RF01024	cm	1	88	87911	87985	-	no	1	0.27	0.2	32.3	0.0065
Scaffold_108	mir-192	RF00130	cm	1	106	91727	91825	+	no	1	0.38	0	35	4.7e-05
Scaffold_108	mir-450	RF00708	cm	11	79	104081	104172	+	no	1	0.24	3.3	31.9	0.027
Scaffold_108	mir-944	RF01024	cm	1	88	105408	105510	-	no	1	0.28	0.5	44.8	4.6e-06
Scaffold_108	mir-370	RF00740	cm	1	79	108155	108231	+	no	1	0.38	0	23.3	1
Scaffold_109	tRNA	RF00005	cm	1	71	3721	3822	+	no	1	0.51	0	45.1	4.8e-07
Scaffold_109	GRIK4_3p_UTR	RF01383	cm	1	86	28202	28280	+	no	1	0.62	0	13.2	170
Scaffold_109	mir-684	RF00876	cm	1	88	34617	34716	+	no	1	0.6	0	16.1	120
Scaffold_109	mir-636	RF01008	cm	1	99	73457	73553	-	no	1	0.54	0	20.6	56
Scaffold_109	mir-583	RF00976	cm	1	75	95211	95324	-	no	1	0.62	0	27.4	0.021
Scaffold_11	CRISPR-DR46	RF01359	cm	1	38	160278	160314	-	no	1	0.38	0	22.7	7.5
Scaffold_11	CRISPR-DR8	RF01321	cm	1	37	219939	219974	+	no	1	0.47	0	19.1	3.5
Scaffold_11	snoR127	RF01427	cm	1	139	236405	236483	-	no	1	0.44	0	22.1	1.5
Scaffold_11	sn2524	RF01212	cm	1	109	245376	245453	+	no	1	0.46	0	23	5.4
Scaffold_11	PSLVbeta_UPD-PK2	RF01110	cm	1	22	257715	257736	-	no	1	0.45	0	20.1	47
Scaffold_11	tRNA	RF00005	cm	1	71	377168	377251	-	no	1	0.51	0	48.9	4.4e-08
Scaffold_11	CRISPR-DR56	RF01369	cm	1	37	389969	389996	+	no	1	0.5	0	23	0.74
Scaffold_11	mir-197	RF00707	cm	1	75	415455	415557	-	no	1	0.67	0	22.1	4.5
Scaffold_11	snR50	RF01190	cm	1	89	417240	417304	-	no	1	0.34	0	21	18
Scaffold_11	MIR828	RF01026	cm	1	100	419583	419679	+	no	1	0.3	0.1	18.8	27
Scaffold_110	SBRMV1_UPD-PKf	RF01107	cm	1	27	19816	19842	+	no	1	0.37	0	22	1.7
Scaffold_110	sn3071	RF01166	cm	1	77	22216	22273	-	no	1	0.43	0	20.9	1.6
Scaffold_110	snoR14	RF01280	cm	1	84	34561	34648	+	no	1	0.56	0	21.2	2.1
Scaffold_110	S_pombe_snR97	RF01451	cm	1	148	37621	37748	-	no	1	0.47	0	12.8	650
Scaffold_111	tRNA	RF00005	cm	1	71	24283	24369	+	no	1	0.59	0	34.8	0.0003
Scaffold_111	tRNA	RF00005	cm	1	71	25855	25941	+	no	1	0.59	0	24.7	0.17
Scaffold_111	miR-430	RF01413	cm	1	89	27036	27124	+	no	1	0.46	0	21.5	0.96
Scaffold_111	TB11Cs4H1	RF01539	cm	1	71	39630	39699	-	no	1	0.63	0	18.7	14
Scaffold_111	snoZ173	RF00313	cm	1	107	54875	54972	+	no	1	0.41	0	21	4.6
Scaffold_111	mir-136	RF00687	cm	1	83	90510	90637	-	no	1	0.5	0	39.2	8.5e-05
Scaffold_113	snR87	RF01216	cm	1	109	39068	39147	-	no	1	0.41	0	20.3	10
Scaffold_113	ctRNA_pT181	RF00242	cm	1	94	97181	97282	+	no	1	0.51	0	21.7	44
Scaffold_114	mir-876	RF00935	cm	1	81	36094	36195	-	no	1	0.53	0	41.4	5.5e-06
Scaffold_114	rli23	RF01458	cm	1	98	37163	37251	+	no	1	0.43	0	26.2	0.59
Scaffold_114	CRISPR-DR49	RF01362	cm	1	47	42950	42984	+	no	1	0.31	0	21.8	6.1
Scaffold_114	snoR43	RF00316	cm	1	73	45012	45080	-	no	1	0.42	0	20.1	13
Scaffold_115	mir-876	RF00935	cm	1	81	73604	73635	+	no	1	0.53	0	25.1	0.15
Scaffold_115	GRIK4_3p_UTR	RF01383	cm	1	86	81610	81633	-	no	1	0.54	0	12.2	320
Scaffold_115	mir-395	RF00451	cm	1	104	82002	82099	-	no	1	0.58	0	37.4	7.2e-05
Scaffold_115	mir-876	RF00935	cm	1	81	82070	82111	+	no	1	0.55	0	34.3	0.00047
Scaffold_115	mir-556	RF00969	cm	1	95	86804	86871	-	no	1	0.32	0	21.5	10
Scaffold_115	mir-684	RF00876	cm	1	88	89357	89436	-	no	1	0.32	0	27	0.21
Scaffold_115	snR62	RF01205	cm	1	100	92562	92660	+	no	1	0.39	0	20.2	360
Scaffold_115	SNORD75	RF00612	cm	1	62	95336	95393	-	no	1	0.43	0	22.4	0.031
Scaffold_115	ctRNA_pT181	RF00242	cm	1	94	101316	101419	-	no	1	0.29	0.6	21.8	41
Scaffold_116	SBWMV2_UPD-PKb	RF01104	cm	1	29	233	259	-	no	1	0.48	0	22	0.99
Scaffold_116	CRISPR-DR44	RF01353	cm	1	28	11784	11811	+	no	1	0.29	0	21.4	12
Scaffold_116	CRISPR-DR44	RF01353	cm	1	28	13216	13243	+	no	1	0.29	0	21.4	12
Scaffold_116	SNORD43	RF00221	cm	1	92	51917	51961	-	no	1	0.58	0	21.8	0.51
Scaffold_116	mir-133	RF00446	cm	1	87	52037	52118	+	no	1	0.6	0	21.7	0.16
Scaffold_116	mir-653	RF00937	cm	1	98	58249	58353	+	no	1	0.34	0	47.9	6.6e-07
Scaffold_116	CRISPR-DR28	RF01356	cm	1	24	72179	72213	+	no	1	0.57	0	18.9	20
Scaffold_116	snoR4a	RF01301	cm	1	77	80035	80097	+	no	1	0.38	0	20.1	12
Scaffold_117	snoZ157	RF00333	cm	1	100	3375	3475	-	no	1	0.38	0	20.7	2.9
Scaffold_117	mir-9	RF00237	cm	1	62	4516	4608	+	no	1	0.4	0	25.8	0.089
Scaffold_117	mir-186	RF00697	cm	1	93	7216	7315	+	no	1	0.27	1.1	46.8	5.4e-06
Scaffold_117	snoZ5	RF01226	cm	1	113	10930	11035	+	no	1	0.38	0	21.9	5.9
Scaffold_117	snoR160	RF00203	cm	1	80	45307	45370	+	no	1	0.34	0	20.6	35
Scaffold_117	mir-576	RF00984	cm	1	98	90628	90710	+	no	1	0.52	0	22.9	0.54
Scaffold_118	snoZ247	RF00321	cm	1	139	68002	68106	-	no	1	0.46	0	18.7	7.3
Scaffold_119	U2	RF00004	cm	1	193	25861	26051	+	no	1	0.46	0	89.4	2.8e-17
Scaffold_119	snoU49	RF01300	cm	1	73	30663	30738	-	no	1	0.49	0	20.3	1.3
Scaffold_119	P10	RF01668	cm	1	72	36726	36776	+	no	1	0.73	0	20.2	0.35
Scaffold_119	GRIK4_3p_UTR	RF01383	cm	1	86	48019	48080	-	no	1	0.61	0	13.3	160
Scaffold_119	CRISPR-DR16	RF01330	cm	1	37	90516	90556	+	no	1	0.44	0	21	0.5
Scaffold_119	CRISPR-DR16	RF01330	cm	1	37	90604	90644	+	no	1	0.44	0	21	0.5
Scaffold_119	CRISPR-DR37	RF01347	cm	1	35	91307	91336	+	no	1	0.4	0	20.8	6.6
Scaffold_12	U5	RF00020	cm	1	116	49653	49770	-	no	1	0.47	0	63.5	6.1e-09
Scaffold_12	tRNA	RF00005	cm	1	71	88406	88500	-	no	1	0.49	0	49.7	2.7e-08
Scaffold_12	GRIK4_3p_UTR	RF01383	cm	1	86	103750	103835	-	no	1	0.6	0	13.9	110
Scaffold_12	SBWMV1_UPD-PKb	RF01106	cm	1	25	108786	108810	+	no	1	0.56	0	20.8	15
Scaffold_12	Pospi_RY	RF00362	cm	1	79	226947	227004	-	no	1	0.57	0	21	4
Scaffold_12	U6	RF00026	cm	1	104	259429	259549	-	no	1	0.45	0	89.4	3.4e-21
Scaffold_12	GRIK4_3p_UTR	RF01383	cm	3	61	262390	262444	-	no	1	0.6	0.5	15	58
Scaffold_12	tRNA	RF00005	cm	1	71	274806	274877	+	no	1	0.53	0	58.8	8.9e-11
Scaffold_12	tRNA	RF00005	cm	1	71	295450	295548	-	no	1	0.47	0	50.5	1.7e-08
Scaffold_12	mir-460	RF00712	cm	1	77	336494	336582	+	no	1	0.46	0	23.3	0.15
Scaffold_12	SCARNA18	RF00283	cm	1	83	359554	359633	-	no	1	0.46	0	22.8	0.19
Scaffold_120	mir-598	RF01059	cm	1	97	9339	9430	+	no	1	0.36	0	42	0.00018
Scaffold_120	snoR20	RF00351	cm	1	90	10188	10283	+	no	1	0.28	1.9	35.9	0.047
Scaffold_120	RF_site3	RF01079	cm	1	39	56695	56725	-	no	1	0.39	0	20.7	4.1
Scaffold_120	rox2	RF01666	cm	1	71	71747	71811	+	no	1	0.29	0.3	20.6	12
Scaffold_120	GRIK4_3p_UTR	RF01383	cm	1	86	88636	88723	+	no	1	0.57	0	16.9	19
Scaffold_122	Y_RNA	RF00019	cm	1	96	40594	40704	+	no	1	0.45	0	23	0.52
Scaffold_123	mir-572	RF01020	cm	1	56	47458	47513	-	no	1	0.59	0	20.4	23
Scaffold_123	GRIK4_3p_UTR	RF01383	cm	1	86	69875	69919	+	no	1	0.47	0	12.4	280
Scaffold_123	GRIK4_3p_UTR	RF01383	cm	1	86	85635	85726	-	no	1	0.59	0	13.8	120
Scaffold_124	PK1-TEV_CVMV	RF01102	cm	1	37	43953	43983	-	no	1	0.45	0	20.1	21
Scaffold_125	mir-944	RF01024	cm	1	88	44636	44728	-	no	1	0.28	0.5	23.5	1.1
Scaffold_125	MIR529	RF00908	cm	1	131	44790	44874	-	no	1	0.31	0	26	0.018
Scaffold_125	mir-6	RF00143	cm	18	59	58793	58834	+	no	1	0.29	0	21.5	6.4
Scaffold_125	mir-944	RF01024	cm	1	88	59367	59448	-	no	1	0.29	0.1	23.7	0.95
Scaffold_125	mir-259	RF00850	cm	1	103	59825	59949	-	no	1	0.26	7.2	23.6	0.16
Scaffold_125	snR62	RF01205	cm	1	100	61060	61146	+	no	1	0.33	0	21	260
Scaffold_126	5S_rRNA	RF00001	cm	1	119	20454	20586	+	no	1	0.5	0	16.3	27
Scaffold_127	CRISPR-DR8	RF01321	cm	1	37	87603	87674	-	no	1	0.4	0.8	16	28
Scaffold_128	mir-580	RF01000	cm	1	97	37099	37160	-	no	1	0.45	0	24.6	0.18
Scaffold_128	K_chan_RES	RF00485	cm	1	114	60556	60634	+	no	1	0.44	0	22.7	0.89
Scaffold_128	SNORD63	RF00154	cm	1	70	70030	70092	-	no	1	0.43	0	19.9	9
Scaffold_129	S_pombe_snR97	RF01451	cm	1	148	55072	55188	+	no	1	0.39	0	13.1	560
Scaffold_129	S_pombe_snR97	RF01451	cm	1	148	55216	55254	+	no	1	0.21	0.3	5.8	22000
Scaffold_129	tRNA	RF00005	cm	1	71	63065	63168	+	no	1	0.53	0	50.3	1.9e-08
Scaffold_129	mir-578	RF00971	cm	1	96	70483	70555	+	no	1	0.37	0	22.6	2.4
Scaffold_129	GRIK4_3p_UTR	RF01383	cm	1	86	75487	75540	-	no	1	0.59	0	14.3	88
Scaffold_13	snoR160	RF00203	cm	1	80	115263	115349	+	no	1	0.48	0	20.6	34
Scaffold_13	snoU83D	RF01175	cm	1	81	136125	136199	-	no	1	0.41	0	21.8	2.4
Scaffold_13	snoZ247	RF00321	cm	1	139	144428	144534	-	no	1	0.5	0	19.6	4.5
Scaffold_13	FinP	RF00107	cm	1	79	169122	169194	-	no	1	0.56	0	25.2	0.21
Scaffold_13	snoR11	RF00349	cm	1	90	178611	178695	-	no	1	0.45	0	24.1	1.4
Scaffold_13	snoZ223	RF00135	cm	1	94	256110	256169	+	no	1	0.57	0	17.6	32
Scaffold_13	MIR164	RF00647	cm	1	110	272970	273019	+	no	1	0.54	0	24.3	0.029
Scaffold_13	MIR164	RF00647	cm	1	110	273051	273100	+	no	1	0.54	0	24.3	0.029
Scaffold_13	snoZ223	RF00135	cm	1	94	286660	286719	+	no	1	0.58	0	17.6	31
Scaffold_130	snoZ6	RF00285	cm	1	91	55064	55151	-	no	1	0.6	0	20.1	0.78
Scaffold_130	snoZ118	RF00142	cm	1	108	79430	79516	-	no	1	0.46	0	20.8	7.5
Scaffold_131	SNORD98	RF00607	cm	1	65	24465	24524	+	no	1	0.43	0	20.7	3.1
Scaffold_131	mir-876	RF00935	cm	1	81	43018	43076	-	no	1	0.42	0	32.5	0.0014
Scaffold_132	CRISPR-DR28	RF01356	cm	1	24	20221	20244	+	no	1	0.67	0	17.7	37
Scaffold_132	tRNA	RF00005	cm	1	71	47241	47312	-	no	1	0.53	0	58.8	8.9e-11
Scaffold_132	GRIK4_3p_UTR	RF01383	cm	1	86	56466	56558	-	no	1	0.61	0	14.5	77
Scaffold_133	mir-iab-4	RF00725	cm	1	84	64677	64745	+	no	1	0.48	0	20.1	2.4
Scaffold_135	GRIK4_3p_UTR	RF01383	cm	1	86	14527	14595	+	no	1	0.58	0	12.7	230
Scaffold_135	S_pombe_snR97	RF01451	cm	1	148	18690	18727	+	no	1	0.24	0	8.8	4800
Scaffold_135	S_pombe_snR97	RF01451	cm	1	148	24935	24972	+	no	1	0.24	0	8.8	4800
Scaffold_135	snoZ247	RF00321	cm	1	139	56040	56112	-	no	1	0.42	0	25.8	0.13
Scaffold_135	MIR821	RF00885	cm	1	275	56370	56535	+	no	1	0.36	0	103.4	3.2e-21
Scaffold_135	snoZ182	RF00314	cm	1	92	82325	82402	+	no	1	0.38	0	20.6	6
Scaffold_136	RF_site6	RF01094	cm	1	118	32778	32872	-	no	1	0.34	0	20.8	21
Scaffold_136	snoU31b	RF01285	cm	1	86	40682	40755	-	no	1	0.43	0	20.2	4.6
Scaffold_136	sn2841	RF01160	cm	1	72	50643	50704	-	no	1	0.42	0	20	2.8
Scaffold_137	tRNA	RF00005	cm	1	71	55851	55923	-	no	1	0.56	0	56.2	4.6e-10
Scaffold_139	tRNA	RF00005	cm	1	71	18392	18491	+	no	1	0.54	0	44.3	8e-07
Scaffold_14	tRNA	RF00005	cm	1	71	84471	84542	+	no	1	0.51	0	57.3	2.3e-10
Scaffold_14	snoZ169	RF00331	cm	1	69	85592	85622	-	no	1	0.48	0	21.3	8.4
Scaffold_14	CRISPR-DR20	RF01333	cm	1	36	111650	111689	+	no	1	0.57	0	20.4	2.3
Scaffold_14	MicF	RF00033	cm	1	94	228272	228361	-	no	1	0.37	0.2	20.5	32
Scaffold_14	GRIK4_3p_UTR	RF01383	cm	1	86	284985	285097	+	no	1	0.57	0	12.5	250
Scaffold_14	snoMe28S-U3344	RF00526	cm	1	83	287694	287774	-	no	1	0.36	0	26	0.51
Scaffold_14	tRNA	RF00005	cm	1	71	294989	295091	-	no	1	0.48	0	52.8	3.9e-09
Scaffold_14	SNORD70	RF00575	cm	1	89	321450	321517	+	no	1	0.34	0	20.4	31
Scaffold_140	ctRNA_pND324	RF00238	cm	1	86	20446	20525	-	no	1	0.28	0.2	21.5	23
Scaffold_140	RtT	RF00391	cm	1	130	68884	69012	+	no	1	0.5	0	20.2	3
Scaffold_143	snoZ196	RF00134	cm	1	85	46003	46096	+	no	1	0.31	0	20.6	40
Scaffold_143	CRISPR-DR20	RF01333	cm	1	36	79437	79470	-	no	1	0.59	0	22	0.83
Scaffold_144	SBWMV2_UPD-PKl	RF01105	cm	1	27	58074	58101	-	no	1	0.29	0	21.4	25
Scaffold_144	Mg_sensor	RF01056	cm	1	115	71702	71811	+	no	1	0.6	0	22.7	0.54
Scaffold_145	Bacillus-plasmid	RF01691	cm	1	61	52378	52469	+	no	1	0.48	0	19.1	2.4
Scaffold_146	tRNA	RF00005	cm	1	71	30579	30661	-	no	1	0.47	0	55.2	8.5e-10
Scaffold_146	tRNA	RF00005	cm	1	71	40436	40555	+	no	1	0.54	0	49.4	3.3e-08
Scaffold_146	SBWMV1_UPD-PKe	RF01081	cm	1	26	45005	45030	-	no	1	0.42	0	19.7	9.5
Scaffold_147	RNaseP_nuc	RF00009	cm	1	303	55741	56380	+	no	1	0.56	1.5	71.4	7.3e-20
Scaffold_148	snoZ6	RF00285	cm	1	91	15532	15578	+	no	1	0.62	0	21	0.42
Scaffold_148	GRIK4_3p_UTR	RF01383	cm	1	86	45169	45243	-	no	1	0.65	0	13.6	140
Scaffold_148	U4	RF00015	cm	1	139	54085	54222	+	no	1	0.47	0	58.2	2.1e-10
Scaffold_149	snoZ169	RF00331	cm	1	69	24484	24547	+	no	1	0.41	0	23	3.2
Scaffold_149	S_pombe_snR97	RF01451	cm	1	148	24577	24644	-	no	1	0.37	0	9.5	3500
Scaffold_15	mir-920	RF00986	cm	1	75	9510	9616	+	no	1	0.5	0	26	0.041
Scaffold_15	mir-576	RF00984	cm	1	98	31219	31301	+	no	1	0.52	0	22	0.98
Scaffold_15	snoR11	RF00349	cm	1	90	52552	52641	+	no	1	0.36	0.1	22.3	4
Scaffold_15	mir-449	RF00711	cm	1	90	58340	58460	-	no	1	0.46	0	26	0.0082
Scaffold_15	snoR69Y	RF01198	cm	1	99	59666	59771	-	no	1	0.41	0	21.3	4.4
Scaffold_15	mir-876	RF00935	cm	1	81	73096	73156	-	no	1	0.36	0	27.6	0.032
Scaffold_15	mir-450	RF00708	cm	11	79	79769	79860	+	no	1	0.27	0.6	27.6	0.3
Scaffold_15	S_pombe_snR97	RF01451	cm	1	148	157760	157825	-	no	1	0.27	0.1	10	2700
Scaffold_15	CRISPR-DR8	RF01321	cm	1	37	219764	219798	+	no	1	0.46	0	20.4	1.4
Scaffold_15	CRISPR-DR59	RF01372	cm	1	37	300275	300311	+	no	1	0.68	0	20.2	2.9
Scaffold_150	SBWMV1_UPD-PKb	RF01106	cm	1	25	20801	20825	-	no	1	0.44	0	20	22
Scaffold_150	snoMe28S-Cm3227	RF00536	cm	1	82	51358	51428	-	no	1	0.34	0	20.8	28
Scaffold_151	MicF	RF00033	cm	1	94	38344	38438	-	no	1	0.31	1	23.9	6.7
Scaffold_151	PK-HAV	RF01096	cm	2	48	39354	39403	-	no	1	0.26	0	22.1	54
Scaffold_152	snoZ7	RF00268	cm	1	78	60512	60590	+	no	1	0.43	0	24.2	0.7
Scaffold_152	MIR1444	RF00956	cm	1	85	66091	66171	-	no	1	0.41	0	22.6	1.3
Scaffold_153	gabT	RF01738	cm	1	61	33956	34012	-	no	1	0.63	0	21.5	8.7
Scaffold_154	tRNA	RF00005	cm	1	71	6552	6631	+	no	1	0.59	0	54.3	1.5e-09
Scaffold_154	tRNA	RF00005	cm	1	71	7294	7373	+	no	1	0.6	0	54.9	1.1e-09
Scaffold_154	RF_site6	RF01094	cm	1	118	15459	15559	+	no	1	0.47	0	20.2	28
Scaffold_154	CRISPR-DR8	RF01321	cm	1	37	70596	70634	+	no	1	0.56	0	21.7	0.6
Scaffold_155	PSLVbeta_UPD-PK2	RF01110	cm	1	22	15593	15614	-	no	1	0.32	0	21.3	25
Scaffold_155	GRIK4_3p_UTR	RF01383	cm	1	86	26402	26494	+	no	1	0.49	0	14.8	66
Scaffold_155	mir-BART20	RF00864	cm	1	81	35493	35554	-	no	1	0.5	0	20	3.8
Scaffold_156	snR62	RF01205	cm	1	100	36104	36203	+	no	1	0.39	0	21.2	230
Scaffold_156	mir-549	RF00965	cm	1	96	50711	50797	-	no	1	0.49	0	31.1	0.0038
Scaffold_156	GRIK4_3p_UTR	RF01383	cm	1	86	59215	59306	-	no	1	0.59	0	16.6	22
Scaffold_158	Prion_pknot	RF00523	cm	1	40	14578	14611	+	no	1	0.71	0.3	27.4	0.044
Scaffold_158	GRIK4_3p_UTR	RF01383	cm	1	86	21885	21959	+	no	1	0.56	0	13.5	140
Scaffold_159	CRISPR-DR8	RF01321	cm	1	37	46429	46491	-	no	1	0.49	0	16.1	27
Scaffold_159	snoMe28S-Gm3113	RF00531	cm	1	85	70218	70312	-	no	1	0.38	0	20.7	10
Scaffold_16	snoU83C	RF01187	cm	1	86	20907	20985	-	no	1	0.44	0	20.3	1.3
Scaffold_16	mir-578	RF00971	cm	1	96	43559	43652	+	no	1	0.53	0	44.6	4.8e-06
Scaffold_16	snoR11	RF00349	cm	1	90	252126	252211	+	no	1	0.44	0	20.4	12
Scaffold_16	BMV3_UPD-PK3	RF01113	cm	1	23	266868	266890	-	no	1	0.35	0	20.1	17
Scaffold_160	GRIK4_3p_UTR	RF01383	cm	1	86	13454	13528	+	no	1	0.52	0	13.1	180
Scaffold_160	snoR14	RF01280	cm	1	84	17238	17262	+	no	1	0.48	0	20.5	3.3
Scaffold_160	GRIK4_3p_UTR	RF01383	cm	1	86	31975	32058	-	no	1	0.61	0	13.8	120
Scaffold_160	mir-505	RF00781	cm	1	84	58127	58206	+	no	1	0.38	0	29.1	0.057
Scaffold_161	S_pombe_snR97	RF01451	cm	1	148	2501	2616	+	no	1	0.41	0	11.3	1400
Scaffold_161	snR62	RF01205	cm	1	100	3980	4079	+	no	1	0.35	0	23.3	98
Scaffold_161	mir-684	RF00876	cm	1	88	18241	18320	-	no	1	0.31	0	22.1	3.7
Scaffold_161	snoZ247	RF00321	cm	1	139	23855	23926	-	no	1	0.43	0	24.9	0.23
Scaffold_161	snoJ26	RF00336	cm	1	147	33923	34048	+	no	1	0.43	0	22.4	4.9
Scaffold_161	mir-684	RF00876	cm	1	88	50586	50665	-	no	1	0.31	0	21.6	4.8
Scaffold_161	mir-276	RF00637	cm	1	94	62935	63016	-	no	1	0.33	0	27.6	0.0027
Scaffold_161	mir-944	RF01024	cm	1	88	64809	64910	+	no	1	0.29	0.2	44.2	6.2e-06
Scaffold_162	mir-452	RF00839	cm	1	85	4816	4905	+	no	1	0.34	0	25.9	0.2
Scaffold_162	mir-577	RF01013	cm	1	96	10612	10699	-	no	1	0.34	0	20	3.6
Scaffold_162	mir-203	RF00696	cm	1	80	24447	24517	-	no	1	0.37	0	29.8	0.00098
Scaffold_162	snosnR60_Z15	RF00309	cm	1	98	45134	45187	-	no	1	0.33	0	20.5	19
Scaffold_162	snoZ223	RF00135	cm	1	94	70560	70639	-	no	1	0.29	0.4	19.9	7.4
Scaffold_162	snoZ161_228	RF00328	cm	1	93	70639	70722	-	no	1	0.29	0.1	26	0.21
Scaffold_163	tRNA	RF00005	cm	1	71	7995	8092	-	no	1	0.54	0	55.2	8.7e-10
Scaffold_164	SNORD34	RF00147	cm	1	81	46413	46488	+	no	1	0.47	0	20.1	15
Scaffold_165	BMV3_UPD-PK3	RF01113	cm	1	23	22551	22573	+	no	1	0.48	0	20.3	15
Scaffold_165	mir-214	RF00660	cm	1	110	23632	23729	-	no	1	0.35	0	43.6	8.6e-07
Scaffold_165	MIR480	RF00782	cm	1	140	34733	34816	+	no	1	0.36	0	27	3.3
Scaffold_165	SNORD63	RF00154	cm	1	70	42540	42604	+	no	1	0.45	0	20.9	5
Scaffold_167	CRISPR-DR34	RF01344	cm	1	36	17421	17459	-	no	1	0.41	0	25.2	0.19
Scaffold_169	mir-259	RF00850	cm	1	103	49349	49432	+	no	1	0.38	0	23.4	0.18
Scaffold_17	snoU35	RF01298	cm	1	69	21138	21201	+	no	1	0.31	0	21	1.2
Scaffold_17	SNORA52	RF00419	cm	1	134	87555	87660	+	no	1	0.42	0	25.9	0.042
Scaffold_17	snoZ248	RF00305	cm	1	137	130939	130985	-	no	1	0.64	0	23.7	0.59
Scaffold_17	nos_TCE	RF00161	cm	1	64	168750	168788	-	no	1	0.49	0	20.6	3.7
Scaffold_17	MIR828	RF01026	cm	1	100	210167	210262	-	no	1	0.35	0	18.1	40
Scaffold_17	tRNA	RF00005	cm	1	71	271140	271212	-	no	1	0.58	0	54.6	1.2e-09
Scaffold_170	snosnR60_Z15	RF00309	cm	1	98	20471	20559	-	no	1	0.45	0	48.5	9.4e-06
Scaffold_170	CRISPR-DR56	RF01369	cm	1	37	67405	67474	+	no	1	0.4	0	20.9	2.7
Scaffold_171	snoMe28S-G3255	RF00527	cm	1	84	61595	61651	-	no	1	0.35	0	20.3	130
Scaffold_172	snoR114	RF01421	cm	1	87	29125	29188	+	no	1	0.5	0	27.3	0.082
Scaffold_172	CRISPR-DR8	RF01321	cm	1	37	40077	40101	-	no	1	0.48	0	16.2	25
Scaffold_175	CRISPR-DR49	RF01362	cm	1	47	7172	7206	-	no	1	0.34	0	21.3	8.2
Scaffold_175	snoZ196	RF00134	cm	1	85	25486	25545	-	no	1	0.43	0	21.7	23
Scaffold_176	snoZ199	RF00200	cm	1	84	59015	59070	+	no	1	0.43	0	24	2.9
Scaffold_177	ctRNA_pND324	RF00238	cm	1	86	31409	31473	-	no	1	0.37	0	21.2	27
Scaffold_178	SNORD37	RF00440	cm	1	65	31561	31626	-	no	1	0.42	0	20.8	17
Scaffold_178	GRIK4_3p_UTR	RF01383	cm	1	86	54687	54726	-	no	1	0.57	0	16.6	22
Scaffold_179	msr	RF00170	cm	1	72	21952	22024	-	no	1	0.4	0	20.4	5.3
Scaffold_179	snoU2_19	RF00494	cm	1	80	35286	35336	-	no	1	0.37	0	23.2	5.8
Scaffold_179	CRISPR-DR31	RF01357	cm	1	37	46087	46107	-	no	1	0.43	0	21.7	0.6
Scaffold_18	SNORD70	RF00575	cm	1	89	10320	10411	-	no	1	0.46	0	26.7	1.3
Scaffold_18	mir-616	RF00995	cm	1	97	76966	77089	-	no	1	0.49	0	21.2	2.5
Scaffold_18	GRIK4_3p_UTR	RF01383	cm	1	86	206381	206468	+	no	1	0.64	0	15.1	56
Scaffold_180	tRNA	RF00005	cm	1	71	39481	39563	+	no	1	0.52	0	46.9	1.6e-07
Scaffold_180	tRNA	RF00005	cm	1	71	41991	42070	-	no	1	0.51	0	47.1	1.3e-07
Scaffold_180	MIR477	RF00780	cm	1	99	49683	49762	-	no	1	0.57	0	43.1	5.2e-07
Scaffold_181	snoR160	RF00203	cm	1	80	7708	7774	-	no	1	0.39	0	20.2	43
Scaffold_181	snoU43C	RF01154	cm	1	66	8512	8566	+	no	1	0.25	0.1	21	23
Scaffold_181	snoR99	RF01208	cm	1	106	39419	39505	+	no	1	0.47	0	20.4	18
Scaffold_182	Flavo-1	RF01705	cm	1	76	8582	8669	-	no	1	0.4	0	19.1	2.6
Scaffold_182	tRNA	RF00005	cm	1	71	22025	22107	+	no	1	0.61	0	43.5	1.3e-06
Scaffold_182	Rota_CRE	RF00501	cm	1	68	43596	43707	-	no	1	0.42	0	23	0.59
Scaffold_183	CRISPR-DR28	RF01356	cm	1	24	2055	2081	-	no	1	0.7	0	19.1	17
Scaffold_184	S_pombe_snR97	RF01451	cm	1	148	1556	1601	-	no	1	0.35	0	11.7	1100
Scaffold_184	snR62	RF01205	cm	1	100	13374	13463	-	no	1	0.3	0	21	250
Scaffold_184	snoU49	RF01300	cm	1	73	58584	58652	+	no	1	0.32	0	20.3	1.3
Scaffold_185	S_pombe_snR97	RF01451	cm	34	69	30397	30432	+	no	1	0.36	0	8.2	6500
Scaffold_185	mir-944	RF01024	cm	1	88	38920	38999	+	no	1	0.36	0	21.4	3.6
Scaffold_185	snoR160	RF00203	cm	1	80	40567	40640	-	no	1	0.28	0	23.5	7.4
Scaffold_185	6S-Flavo	RF01685	cm	1	109	43736	43794	-	no	1	0.37	0	22.6	27
Scaffold_185	snoR160	RF00203	cm	1	80	48217	48303	+	no	1	0.4	0	20.1	45
Scaffold_187	mir-684	RF00876	cm	1	88	10147	10226	-	no	1	0.3	0	23.3	1.8
Scaffold_187	WLE3	RF01046	cm	1	44	49971	49992	-	no	1	0.45	0	23.3	0.13
Scaffold_187	S_pombe_snR97	RF01451	cm	1	148	60497	60580	-	no	1	0.29	0.1	10.4	2200
Scaffold_189	snoZ102_R77	RF00359	cm	1	88	5948	6040	+	no	1	0.41	0	20.2	39
Scaffold_189	tRNA	RF00005	cm	1	71	48669	48748	+	no	1	0.52	0	45.7	3.4e-07
Scaffold_19	mir-299	RF00756	cm	1	63	180849	180918	+	no	1	0.49	0	22	0.56
Scaffold_19	U2	RF00004	cm	1	193	217809	218002	+	no	1	0.48	0	95.1	1.2e-18
Scaffold_190	SNORD27	RF00086	cm	1	77	8855	8932	-	no	1	0.4	0	25.1	1.3
Scaffold_190	PK-repBA	RF01089	cm	1	124	48010	48108	+	no	1	0.31	0.1	20.2	0.74
Scaffold_191	snoZ157	RF00333	cm	1	100	8464	8558	+	no	1	0.38	0	20	4.6
Scaffold_191	mir-944	RF01024	cm	1	88	9169	9254	-	no	1	0.28	0.2	35.1	0.0013
Scaffold_191	snoZ118	RF00142	cm	1	108	40287	40374	+	no	1	0.4	0	21.1	6.3
Scaffold_192	RF_site1	RF01074	cm	1	40	42394	42426	+	no	1	0.48	0	20.9	4.1
Scaffold_192	mir-876	RF00935	cm	1	81	49661	49760	-	no	1	0.54	0	35.5	0.00022
Scaffold_194	mir-M7	RF01009	cm	1	77	23395	23464	-	no	1	0.47	0	20.3	1.6
Scaffold_194	mir-636	RF01008	cm	1	99	31414	31504	-	no	1	0.76	3.3	20.1	71
Scaffold_195	snoU43C	RF01154	cm	1	66	12807	12861	+	no	1	0.27	0	20.3	35
Scaffold_195	snoMe28S-Am2589	RF00529	cm	1	109	13269	13353	-	no	1	0.34	0	21.6	15
Scaffold_195	BMV3_UPD-PK3	RF01113	cm	1	23	18938	18960	+	no	1	0.3	0	20.5	14
Scaffold_195	HLE	RF00437	cm	1	130	23777	23888	+	no	1	0.43	0	20.7	2.2
Scaffold_196	snoR160	RF00203	cm	1	80	2803	2888	+	no	1	0.43	0	21.2	25
Scaffold_197	snoR11	RF00349	cm	1	90	33677	33752	-	no	1	0.49	0	20.5	12
Scaffold_198	snoR14	RF01280	cm	1	84	160	227	-	no	1	0.47	0	20.8	2.6
Scaffold_198	GRIK4_3p_UTR	RF01383	cm	1	86	19385	19427	+	no	1	0.51	0	14.1	100
Scaffold_198	SBWMV1_UPD-PKe	RF01081	cm	1	26	37776	37801	+	no	1	0.5	0	22.8	1.8
Scaffold_198	mir-245	RF00816	cm	1	97	46104	46183	-	no	1	0.36	0	24.5	8.7
Scaffold_2	P10	RF01668	cm	1	72	25138	25215	+	no	1	0.53	0	20.9	0.21
Scaffold_2	PSLVbeta_UPD-PK2	RF01110	cm	1	22	27392	27413	+	no	1	0.36	0	21.2	26
Scaffold_2	snoMe28S-G3255	RF00527	cm	1	84	38365	38451	-	no	1	0.29	0.1	24.2	22
Scaffold_2	GRIK4_3p_UTR	RF01383	cm	1	86	159707	159786	+	no	1	0.5	0	16	31
Scaffold_2	CRISPR-DR32	RF01342	cm	1	37	232477	232513	-	no	1	0.49	0	19.9	14
Scaffold_2	Gurken	RF00626	cm	1	69	331871	331919	+	no	1	0.63	0	20.2	4.6
Scaffold_2	tRNA	RF00005	cm	1	71	341944	342050	-	no	1	0.49	0	52.2	5.8e-09
Scaffold_2	snoZ159	RF00160	cm	1	87	370043	370105	-	no	1	0.37	0	20.7	6.2
Scaffold_2	Bacteroides-1	RF01694	cm	1	83	446127	446202	-	no	1	0.39	0	24.5	1.1
Scaffold_2	SNORD27	RF00086	cm	1	77	452084	452157	+	no	1	0.42	0	22.2	6.7
Scaffold_2	snoR26	RF01286	cm	1	94	547260	547294	+	no	1	0.49	0	21.2	5.1
Scaffold_2	snoR26	RF01286	cm	1	94	547433	547467	+	no	1	0.49	0	21.2	5.1
Scaffold_2	mir-304	RF00853	cm	1	88	559821	559890	-	no	1	0.33	0	22	0.72
Scaffold_2	SNORD100	RF00609	cm	1	82	575625	575707	-	no	1	0.35	0	29.7	0.0063
Scaffold_2	nos_TCE	RF00161	cm	1	64	659268	659327	+	no	1	0.53	0	27.2	0.085
Scaffold_2	tRNA	RF00005	cm	1	71	837137	837224	-	no	1	0.61	0	48.9	4.3e-08
Scaffold_2	snoZ102_R77	RF00359	cm	1	88	850780	850848	+	no	1	0.32	0.9	20.2	39
Scaffold_20	snoZ199	RF00200	cm	1	84	64626	64708	+	no	1	0.41	0	24.4	2.3
Scaffold_20	CRISPR-DR54	RF01367	cm	1	37	83595	83635	-	no	1	0.49	0	22.1	1
Scaffold_20	CRISPR-DR54	RF01367	cm	1	37	83760	83800	-	no	1	0.49	0	22.1	1
Scaffold_20	S_pombe_snR97	RF01451	cm	35	68	84072	84105	+	no	1	0.38	0	8.8	4800
Scaffold_20	GRIK4_3p_UTR	RF01383	cm	1	86	97903	97979	-	no	1	0.51	0	13.5	140
Scaffold_20	snoR160	RF00203	cm	1	80	174678	174722	+	no	1	0.47	0	20.8	31
Scaffold_200	snoR30	RF00046	cm	1	96	331	412	+	no	1	0.49	0	20.5	1.4
Scaffold_200	mir-605	RF01011	cm	1	84	27962	28065	+	no	1	0.5	0	24.1	0.25
Scaffold_200	mir-944	RF01024	cm	1	88	38546	38631	+	no	1	0.31	0	33.6	0.0031
Scaffold_201	snoR77	RF01230	cm	1	131	776	898	+	no	1	0.29	2.1	26.7	0.49
Scaffold_201	mir-576	RF00984	cm	1	98	27849	27931	-	no	1	0.52	0	24.5	0.19
Scaffold_201	SNORD86	RF00594	cm	1	86	28833	28952	+	no	1	0.47	0	21.2	1.3
Scaffold_202	mir-422	RF01030	cm	1	90	27332	27411	-	no	1	0.45	0	34.8	0.00056
Scaffold_202	RUF1	RF01578	cm	1	264	43229	43450	+	no	1	0.37	0	26.8	0.085
Scaffold_202	RUF1	RF01578	cm	1	264	50920	51139	+	no	1	0.38	0	26.2	0.12
Scaffold_203	ctRNA_pND324	RF00238	cm	1	86	46282	46335	+	no	1	0.35	0	20.4	40
Scaffold_203	snoR31	RF01288	cm	1	100	47183	47265	+	no	1	0.34	0	20.8	19
Scaffold_205	snoR43	RF00316	cm	1	73	687	735	-	no	1	0.35	0	22.3	3.9
Scaffold_205	tRNA	RF00005	cm	1	71	7484	7566	+	no	1	0.52	0	46.9	1.6e-07
Scaffold_206	snoZ188	RF00311	cm	1	123	15510	15555	+	no	1	0.48	0	20.3	2.5
Scaffold_209	mir-503	RF00753	cm	1	71	40093	40210	-	no	1	0.47	0	45.1	4.1e-07
Scaffold_21	tRNA	RF00005	cm	1	71	47940	48046	-	no	1	0.51	0	50	2.2e-08
Scaffold_21	GRIK4_3p_UTR	RF01383	cm	1	86	105195	105282	-	no	1	0.49	0	16.9	19
Scaffold_21	GRIK4_3p_UTR	RF01383	cm	1	86	163716	163767	+	no	1	0.58	0	13	200
Scaffold_21	U5	RF00020	cm	1	116	210233	210349	-	no	1	0.5	0	53.3	1.2e-06
Scaffold_21	SNORD98	RF00607	cm	1	65	270863	270941	-	no	1	0.37	0	22.5	1
Scaffold_211	snoR53	RF00338	cm	1	91	22404	22492	-	no	1	0.24	3.9	20.9	62
Scaffold_211	MIR474	RF00779	cm	1	107	24145	24202	-	no	1	0.47	0	27.7	0.024
Scaffold_212	snoZ223	RF00135	cm	1	94	30277	30347	-	no	1	0.49	0	17	45
Scaffold_213	GRIK4_3p_UTR	RF01383	cm	1	86	38617	38697	-	no	1	0.58	0	13	190
Scaffold_214	SBRMV1_UPD-PKd	RF01109	cm	1	21	13219	13239	-	no	1	0.33	0	21.6	2.9
Scaffold_215	mir-944	RF01024	cm	1	88	5662	5783	-	no	1	0.4	0	56.4	5.2e-09
Scaffold_217	mir-944	RF01024	cm	1	88	11797	11877	+	no	1	0.37	0	31.5	0.01
Scaffold_218	snR62	RF01205	cm	1	100	13007	13110	-	no	1	0.26	2.5	21.7	190
Scaffold_218	mir-944	RF01024	cm	1	88	24175	24275	+	no	1	0.27	1.3	49.7	2.6e-07
Scaffold_218	snoZ155	RF00326	cm	1	81	35247	35317	+	no	1	0.37	0	24.4	4.6
Scaffold_22	snoZ196	RF00134	cm	1	85	22204	22292	-	no	1	0.36	0	20.8	37
Scaffold_22	tRNA	RF00005	cm	1	71	42775	42871	-	no	1	0.55	0	51.3	9.7e-09
Scaffold_22	mir-331	RF00769	cm	1	94	58428	58541	+	no	1	0.49	0	22.4	0.66
Scaffold_22	tRNA	RF00005	cm	1	71	68399	68510	+	no	1	0.54	0	33.1	0.00085
Scaffold_22	tRNA	RF00005	cm	1	71	113284	113365	+	no	1	0.49	0	58.7	9.4e-11
Scaffold_22	GRIK4_3p_UTR	RF01383	cm	1	86	131633	131698	-	no	1	0.68	0	15.5	43
Scaffold_22	CRISPR-DR44	RF01353	cm	1	28	133743	133770	-	no	1	0.39	0	20.7	19
Scaffold_22	CRISPR-DR28	RF01356	cm	1	24	196605	196627	-	no	1	0.83	0	17.2	51
Scaffold_22	GRIK4_3p_UTR	RF01383	cm	1	86	223010	223095	+	no	1	0.58	0	14.3	89
Scaffold_220	snoJ26	RF00336	cm	1	147	13663	13728	-	no	1	0.39	0	21.3	8.7
Scaffold_222	mir-876	RF00935	cm	1	81	2748	2849	+	no	1	0.56	0	37.6	5.8e-05
Scaffold_222	mir-463	RF00934	cm	1	81	36819	36894	+	no	1	0.43	0	24.2	0.18
Scaffold_222	snoU43C	RF01154	cm	1	66	40493	40524	-	no	1	0.34	0	20.3	34
Scaffold_225	snoZ162	RF00329	cm	1	88	38725	38774	-	no	1	0.34	0	21.6	2.9
Scaffold_228	mir-133	RF00446	cm	1	87	39690	39764	-	no	1	0.45	0	22.5	0.092
Scaffold_228	snoPyro_CD	RF00095	cm	1	58	43019	43063	+	no	1	0.51	0	21.1	0.9
Scaffold_23	GRIK4_3p_UTR	RF01383	cm	1	86	114998	115079	-	no	1	0.57	0	14.9	62
Scaffold_23	sR2	RF01139	hmm	2	50	117091	117137	-	-	6	0.43	0.1	20.6	0.015
Scaffold_23	mir-287	RF00788	cm	1	93	127778	127880	+	no	1	0.29	0.6	20.9	3
Scaffold_23	mir-636	RF01008	cm	1	99	194740	194834	+	no	1	0.65	0	24.9	7.9
Scaffold_23	snoZ223	RF00135	cm	1	94	210769	210837	-	no	1	0.41	0	20.6	4.7
Scaffold_23	GRIK4_3p_UTR	RF01383	cm	1	86	213195	213295	-	no	1	0.6	0	12.7	230
Scaffold_23	RUF1	RF01578	cm	1	264	258984	259202	+	no	1	0.34	1.1	27.9	0.048
Scaffold_230	snoZ5	RF01226	cm	1	113	20080	20186	-	no	1	0.39	0	20.7	11
Scaffold_230	snosnR60_Z15	RF00309	cm	1	98	23468	23558	-	no	1	0.35	0	20.1	24
Scaffold_230	SBRMV1_UPD-PKd	RF01109	cm	1	21	33586	33606	+	no	1	0.52	0	20.3	6.2
Scaffold_231	snoR72	RF00208	cm	1	87	15292	15352	-	no	1	0.31	0	21	35
Scaffold_231	snoR79	RF00323	cm	1	65	27165	27231	-	no	1	0.37	0	20.8	2.1
Scaffold_231	snoMe28S-Am982	RF00535	cm	1	80	28548	28613	-	no	1	0.24	2.1	22.4	4.7
Scaffold_231	mir-609	RF01001	cm	1	95	33357	33441	-	no	1	0.39	0	31.9	0.002
Scaffold_231	mir-BART2	RF00364	cm	1	62	38479	38539	+	no	1	0.49	0	21.9	3.4
Scaffold_232	SNORD63	RF00154	cm	1	70	14246	14276	+	no	1	0.39	0	22.5	2
Scaffold_235	CRISPR-DR28	RF01356	cm	1	24	32411	32429	+	no	1	0.68	0	16.3	81
Scaffold_236	BMV3_UPD-PK3	RF01113	cm	1	23	3281	3303	+	no	1	0.3	0	20.5	14
Scaffold_237	mir-638	RF00978	cm	1	100	7822	7906	-	no	1	0.68	0	21	21
Scaffold_237	MIR1444	RF00956	cm	1	85	18694	18774	+	no	1	0.41	0	22.6	1.3
Scaffold_237	mir-944	RF01024	cm	1	88	24204	24263	+	no	1	0.35	0	20.7	5.4
Scaffold_238	GRIK4_3p_UTR	RF01383	cm	1	86	35564	35646	+	no	1	0.59	0	12.1	330
Scaffold_24	U2	RF00004	cm	1	193	131229	131417	+	no	1	0.48	0	113	5.9e-23
Scaffold_24	PK-BYV	RF01100	cm	2	29	135372	135399	-	no	1	0.54	0	20.1	1.5
Scaffold_24	PK-BYV	RF01100	cm	2	29	137646	137673	-	no	1	0.54	0	20.1	1.5
Scaffold_24	CRISPR-DR47	RF01360	cm	1	37	174238	174274	-	no	1	0.43	0	24.8	0.5
Scaffold_24	S_pombe_snR97	RF01451	cm	82	130	229753	229804	-	no	1	0.42	0	7.5	9500
Scaffold_24	snoZ40	RF00342	cm	1	73	249595	249660	-	no	1	0.52	0	22.4	0.83
Scaffold_24	MIR815	RF00884	cm	1	81	261655	261715	+	no	1	0.43	0	20.1	5.4
Scaffold_240	SBWMV1_UPD-PKb	RF01106	cm	1	25	11112	11137	-	no	1	0.38	0	20.2	21
Scaffold_242	CRISPR-DR56	RF01369	cm	1	37	10894	10921	+	no	1	0.46	0	21.7	1.7
Scaffold_243	mir-576	RF00984	cm	1	98	31899	31981	-	no	1	0.52	0	20.6	2.4
Scaffold_247	S_pombe_snR97	RF01451	cm	1	148	3577	3718	+	no	1	0.34	0.2	24.5	1.9
Scaffold_249	MIR1444	RF00956	cm	1	85	10603	10696	-	no	1	0.29	0.2	23.9	0.57
Scaffold_249	snoU49	RF01300	cm	1	73	27591	27655	-	no	1	0.4	0	21.5	0.6
Scaffold_25	tRNA	RF00005	cm	1	71	20788	20874	-	no	1	0.56	0	48.7	4.9e-08
Scaffold_25	CRISPR-DR50	RF01363	cm	1	46	23354	23395	+	no	1	0.5	0	20.9	24
Scaffold_25	U6	RF00026	cm	1	104	127616	127736	+	no	1	0.45	0	89.4	3.4e-21
Scaffold_25	UPD-PKib	RF01080	cm	1	32	215276	215311	+	no	1	0.33	0	21.6	3.5
Scaffold_253	PhotoRC-II	RF01717	cm	1	95	4394	4481	-	no	1	0.4	0	25.5	0.8
Scaffold_253	mir-580	RF01000	cm	1	97	15554	15620	-	no	1	0.33	0	22	1
Scaffold_253	snoZ223	RF00135	cm	1	94	16013	16111	+	no	1	0.3	0.1	16.7	53
Scaffold_253	mir-556	RF00969	cm	1	95	22128	22195	-	no	1	0.29	0	24	2.5
Scaffold_253	mir-450	RF00708	cm	1	91	22330	22424	-	no	1	0.27	0.7	26.7	0.51
Scaffold_254	TB10Cs5H3	RF01536	cm	1	71	26198	26249	-	no	1	0.5	0	26.7	0.065
Scaffold_256	mir-577	RF01013	cm	1	96	11464	11549	+	no	1	0.28	0.1	29.2	0.013
Scaffold_256	mir-944	RF01024	cm	1	88	15585	15659	+	no	1	0.25	1.3	28.3	0.066
Scaffold_256	mir-395	RF00451	cm	1	104	16837	16911	-	no	1	0.32	0	34.6	0.0004
Scaffold_256	mir-576	RF00984	cm	1	98	16932	17009	+	no	1	0.38	0	24.1	0.25
Scaffold_256	mir-616	RF00995	cm	1	97	17059	17144	+	no	1	0.3	0	26.9	0.077
Scaffold_256	mir-944	RF01024	cm	1	88	29917	30019	-	no	1	0.29	0.2	35.2	0.0012
Scaffold_256	snoMe18S-Um1356	RF00532	cm	1	86	30901	30981	-	no	1	0.32	0	20.5	48
Scaffold_257	CRISPR-DR56	RF01369	cm	1	37	6671	6698	+	no	1	0.5	0	23	0.74
Scaffold_259	tRNA	RF00005	cm	1	71	9877	9957	+	no	1	0.56	0	49	4.1e-08
Scaffold_26	snoZ40	RF00342	cm	1	73	26658	26703	-	no	1	0.3	0	20.8	2.3
Scaffold_26	mir-9	RF00237	cm	1	62	73819	73911	+	no	1	0.38	0	24.2	0.25
Scaffold_26	mir-625	RF01017	cm	1	85	124548	124591	+	no	1	0.64	0	20.2	10
Scaffold_26	GRIK4_3p_UTR	RF01383	cm	3	68	127234	127300	+	no	1	0.63	0	12.5	250
Scaffold_26	GRIK4_3p_UTR	RF01383	cm	1	86	160048	160082	+	no	1	0.57	0	12.1	330
Scaffold_26	snoR11	RF00349	cm	1	90	176804	176893	-	no	1	0.34	0	20.3	13
Scaffold_26	snoZ223	RF00135	cm	1	94	198125	198170	+	no	1	0.46	0	16.6	56
Scaffold_26	SNORD16	RF00138	cm	1	100	217092	217166	-	no	1	0.49	0	24.7	0.5
Scaffold_26	SBRMV1_UPD-PKd	RF01109	cm	1	21	227924	227944	+	no	1	0.43	0	21.3	3.5
Scaffold_26	snoR72	RF00208	cm	1	87	233557	233632	+	no	1	0.37	0	20.9	37
Scaffold_26	snoU43C	RF01154	cm	1	66	234478	234532	-	no	1	0.27	0	20.3	35
Scaffold_26	CRISPR-DR59	RF01372	cm	1	37	238645	238699	-	no	1	0.56	0	21.4	1.4
Scaffold_26	CRISPR-DR59	RF01372	cm	1	37	241126	241180	-	no	1	0.58	0	21.4	1.4
Scaffold_261	SBWMV2_UPD-PKb	RF01104	cm	1	29	29097	29128	-	no	1	0.53	0	20.6	2.4
Scaffold_263	S_pombe_snR97	RF01451	cm	36	67	23560	23591	-	no	1	0.31	0	8.2	6600
Scaffold_264	snoU83C	RF01187	cm	1	86	20963	21045	-	no	1	0.41	0	20.1	1.4
Scaffold_264	mir-296	RF00733	cm	1	80	25520	25598	-	no	1	0.56	0	46.6	7e-07
Scaffold_266	BMV3_UPD-PK1	RF01108	cm	1	26	3723	3748	-	no	1	0.54	0	21.2	1.1
Scaffold_266	BMV3_UPD-PK1	RF01108	cm	1	26	16777	16802	-	no	1	0.54	0	21.2	1.1
Scaffold_266	PK-BYV	RF01100	cm	1	40	22665	22706	+	no	1	0.52	0	23.2	0.2
Scaffold_268	mir-556	RF00969	cm	1	95	30081	30177	+	no	1	0.33	0	22.2	7.1
Scaffold_269	mir-651	RF00972	cm	1	97	16342	16461	+	no	1	0.34	0	31	0.0092
Scaffold_27	tRNA	RF00005	cm	1	71	37606	37707	+	no	1	0.52	0	48.7	5.1e-08
Scaffold_27	tRNA	RF00005	cm	1	71	168839	168931	+	no	1	0.56	0	44.3	8.1e-07
Scaffold_27	P1	RF00623	cm	1	180	227314	227509	-	no	1	0.48	0	23.5	0.3
Scaffold_270	mir-944	RF01024	cm	1	88	15097	15185	+	no	1	0.31	0	37.4	0.00033
Scaffold_270	mir-944	RF01024	cm	1	88	15753	15958	+	no	1	0.31	6.6	33.7	0.0028
Scaffold_270	MIR828	RF01026	cm	17	89	27142	27215	+	no	1	0.32	0	19.1	23
Scaffold_271	mir-207	RF00802	cm	1	79	5721	5794	-	no	1	0.55	0	20.4	13
Scaffold_271	snoZ223	RF00135	cm	1	94	24204	24280	+	no	1	0.51	0	19	13
Scaffold_272	snoU43C	RF01154	cm	1	66	9648	9702	+	no	1	0.27	0	20.3	35
Scaffold_272	GRIK4_3p_UTR	RF01383	cm	1	86	18545	18606	-	no	1	0.6	0	13.3	160
Scaffold_277	snoR24	RF00132	cm	1	97	3005	3091	+	no	1	0.3	0.1	25.3	0.36
Scaffold_277	snoU43C	RF01154	cm	1	66	4734	4788	+	no	1	0.27	0	20.3	35
Scaffold_277	snoZ223	RF00135	cm	1	94	5793	5853	-	no	1	0.44	0	16.7	55
Scaffold_28	snoR160	RF00203	cm	1	80	135089	135143	+	no	1	0.29	0	21.8	18
Scaffold_280	snoZ157	RF00333	cm	1	100	23471	23570	-	no	1	0.49	0	23.2	0.6
Scaffold_282	snoU43C	RF01154	cm	1	66	18777	18831	+	no	1	0.27	0	20.3	35
Scaffold_282	mir-198	RF00681	cm	1	62	26346	26374	+	no	1	0.31	0	20.1	5.3
Scaffold_283	ctRNA_pT181	RF00242	cm	1	94	16418	16475	+	no	1	0.24	0.2	23.5	18
Scaffold_283	CRISPR-DR8	RF01321	cm	1	37	26060	26092	-	no	1	0.48	0	19.2	3.4
Scaffold_284	snoZ196	RF00134	cm	1	85	20665	20749	+	no	1	0.27	0.4	24.9	4.3
Scaffold_289	mir-944	RF01024	cm	1	88	14877	14958	-	no	1	0.35	0	27.2	0.13
Scaffold_29	PK-HAV	RF01096	cm	1	56	58716	58752	-	no	1	0.3	0	21.2	82
Scaffold_29	U6	RF00026	cm	1	104	103127	103210	+	no	1	0.49	0	49.3	1.5e-09
Scaffold_29	tRNA	RF00005	cm	1	71	171976	172086	-	no	1	0.51	0	48.9	4.5e-08
Scaffold_29	CRISPR-DR31	RF01357	cm	1	37	206539	206589	-	no	1	0.49	0	22.4	0.39
Scaffold_291	SNORD27	RF00086	cm	1	77	2292	2366	+	no	1	0.32	0.2	22.7	4.9
Scaffold_291	mir-638	RF00978	cm	1	100	14256	14357	+	no	1	0.62	0	27.9	0.7
Scaffold_294	mir-245	RF00816	cm	1	97	22027	22115	+	no	1	0.25	2.2	24.4	8.8
Scaffold_297	mir-324	RF01063	cm	1	84	5715	5818	+	no	1	0.47	0	33.5	0.0004
Scaffold_297	mir-609	RF01001	cm	1	95	7181	7286	-	no	1	0.47	0	26.3	0.063
Scaffold_298	SBWMV1_UPD-PKe	RF01081	cm	1	26	11148	11169	+	no	1	0.41	0	20	8.1
Scaffold_3	snoZ199	RF00200	cm	1	84	2535	2624	-	no	1	0.4	0	21.6	10
Scaffold_3	mir-556	RF00969	cm	1	95	27418	27515	-	no	1	0.32	0	27.9	0.29
Scaffold_3	mir-203	RF00696	cm	1	80	27551	27621	+	no	1	0.32	0	26.5	0.01
Scaffold_3	mir-944	RF01024	cm	1	88	38858	38950	-	no	1	0.33	0	26.5	0.19
Scaffold_3	mir-944	RF01024	cm	1	88	48757	48849	+	no	1	0.28	0.4	29.9	0.026
Scaffold_3	SBWMV2_UPD-PKl	RF01105	cm	1	27	51715	51741	-	no	1	0.3	0	20.4	41
Scaffold_3	SBWMV2_UPD-PKl	RF01105	cm	1	27	54322	54348	+	no	1	0.22	0.1	21	31
Scaffold_3	snoMe18S-Um1356	RF00532	cm	1	86	56877	56938	+	no	1	0.32	0	24.6	6.7
Scaffold_3	mir-450	RF00708	cm	1	91	72959	73074	+	no	1	0.28	2.2	42.7	5.5e-05
Scaffold_3	mir-166	RF00075	cm	1	126	76072	76201	+	no	1	0.32	0.6	29.2	0.0014
Scaffold_3	mir-576	RF00984	cm	1	98	83024	83106	+	no	1	0.51	0	23.1	0.49
Scaffold_3	GRIK4_3p_UTR	RF01383	cm	1	86	142025	142109	-	no	1	0.6	0	13.4	150
Scaffold_3	Telomerase-cil	RF00025	cm	1	178	271726	271891	+	no	1	0.46	0	22.9	3.1
Scaffold_3	GRIK4_3p_UTR	RF01383	cm	1	86	355633	355718	+	no	1	0.59	0	12.3	290
Scaffold_3	tRNA	RF00005	cm	1	71	384719	384790	-	no	1	0.5	0	63.6	4.6e-12
Scaffold_3	U5	RF00020	cm	1	116	413678	413795	-	no	1	0.5	0	71	1.3e-10
Scaffold_3	U6	RF00026	cm	1	104	502752	502870	-	no	1	0.45	0	89.1	4.3e-21
Scaffold_3	GRIK4_3p_UTR	RF01383	cm	1	86	505944	506021	+	no	1	0.58	0.2	12.7	230
Scaffold_3	snoZ30a	RF01196	cm	1	92	751484	751593	+	no	1	0.5	0	21.5	0.26
Scaffold_3	S_pombe_snR97	RF01451	cm	38	61	797878	797901	+	no	1	0.38	0	8.2	6500
Scaffold_3	S_pombe_snR97	RF01451	cm	38	61	798266	798289	+	no	1	0.38	0	8.2	6500
Scaffold_3	tRNA	RF00005	cm	1	71	800308	800404	-	no	1	0.49	0	49.5	3e-08
Scaffold_3	tRNA	RF00005	cm	1	71	801458	801554	-	no	1	0.49	0	49.5	3e-08
Scaffold_30	MIR529	RF00908	cm	1	131	37755	37876	-	no	1	0.39	0	32.7	0.00019
Scaffold_30	SBWMV1_UPD-PKh	RF01082	cm	1	25	82688	82712	+	no	1	0.6	0	24.4	0.26
Scaffold_30	SNORD21	RF00068	cm	1	95	181459	181508	-	no	1	0.34	0	22.2	3.4
Scaffold_302	mir-876	RF00935	cm	1	81	8198	8279	+	no	1	0.51	0	28.5	0.018
Scaffold_303	snoJ26	RF00336	cm	1	147	8558	8694	+	no	1	0.4	0	22.8	4.1
Scaffold_306	CRISPR-DR56	RF01369	cm	1	37	2448	2475	+	no	1	0.43	0	21.1	2.5
Scaffold_307	TB11Cs4H1	RF01539	cm	1	71	12434	12505	+	no	1	0.56	0	18.7	14
Scaffold_307	TB11Cs4H1	RF01539	cm	1	71	20062	20145	-	no	1	0.44	0	17.2	34
Scaffold_309	GRIK4_3p_UTR	RF01383	cm	1	86	4227	4305	-	no	1	0.48	0	12.4	280
Scaffold_31	CRISPR-DR8	RF01321	cm	1	37	2712	2748	-	no	1	0.41	0	18.4	5.6
Scaffold_31	mir-554	RF01032	cm	1	96	76074	76160	+	no	1	0.44	0	21.2	1.6
Scaffold_31	S_pombe_snR97	RF01451	cm	34	69	123954	123989	+	no	1	0.42	0	8.6	5500
Scaffold_31	MIR821	RF00885	cm	1	275	171247	171542	+	no	1	0.45	0	109.3	1.1e-22
Scaffold_31	mir-BHRF1-1	RF00365	cm	1	66	175011	175070	-	no	1	0.53	0	21.1	2.3
Scaffold_31	GRIK4_3p_UTR	RF01383	cm	1	86	220587	220661	+	no	1	0.69	0.4	16.8	20
Scaffold_310	mir-944	RF01024	cm	1	88	10632	10717	+	no	1	0.31	0	33.6	0.003
Scaffold_311	S_pombe_snR97	RF01451	cm	1	148	12388	12424	+	no	1	0.35	0	13.2	550
Scaffold_313	snoZ223	RF00135	cm	1	94	14996	15041	-	no	1	0.41	0	18.9	14
Scaffold_314	mir-1829	RF00955	cm	1	60	732	795	-	no	1	0.33	0	25.1	0.1
Scaffold_317	CRISPR-DR40	RF01349	cm	1	30	5755	5785	-	no	1	0.23	0	20.7	36
Scaffold_317	TB11Cs2H1	RF01537	cm	1	71	19577	19650	+	no	1	0.43	0	18.8	6.1
Scaffold_32	CAESAR	RF00172	cm	1	80	20369	20437	+	no	1	0.51	0	20.7	4.7
Scaffold_32	snoZ247	RF00321	cm	1	139	133038	133154	+	no	1	0.41	0	22.9	0.66
Scaffold_32	CRISPR-DR56	RF01369	cm	1	37	182241	182276	-	no	1	0.53	0	22.3	1.2
Scaffold_32	tRNA	RF00005	cm	1	71	210317	210412	+	no	1	0.5	0	49.6	2.9e-08
Scaffold_32	PK-HAV	RF01096	cm	1	56	223921	223978	+	no	1	0.28	0	22.8	39
Scaffold_324	tRNA	RF00005	cm	1	71	408	503	+	no	1	0.5	0	49.6	2.9e-08
Scaffold_324	tRNA	RF00005	cm	1	71	1239	1334	+	no	1	0.51	0	49.6	2.9e-08
Scaffold_328	tRNA	RF00005	cm	1	71	11763	11834	-	no	1	0.5	0	63.6	4.6e-12
Scaffold_328	tRNA	RF00005	cm	1	71	12730	12801	-	no	1	0.5	0	63.6	4.6e-12
Scaffold_33	CRISPR-DR8	RF01321	cm	1	37	3231	3259	+	no	1	0.45	0	16.7	18
Scaffold_33	CRISPR-DR56	RF01369	cm	1	37	7129	7156	+	no	1	0.5	0	23	0.74
Scaffold_33	CRISPR-DR28	RF01356	cm	1	24	33971	33998	+	no	1	0.61	0	17	55
Scaffold_33	snoZ247	RF00321	cm	1	139	54699	54753	-	no	1	0.38	0	18.8	7
Scaffold_33	CRISPR-DR28	RF01356	cm	1	24	120303	120334	-	no	1	0.72	0	18.5	24
Scaffold_33	snR62	RF01205	cm	1	100	141325	141420	-	no	1	0.36	0	22.8	120
Scaffold_33	MIR828	RF01026	cm	1	100	147383	147478	-	no	1	0.32	0	19.3	20
Scaffold_33	SNORD70	RF00575	cm	1	89	200822	200921	-	no	1	0.42	0	19.9	40
Scaffold_330	S_pombe_snR97	RF01451	cm	1	148	148	208	+	no	1	0.34	0	16.8	88
Scaffold_334	snoR11	RF00349	cm	1	90	7417	7508	+	no	1	0.42	0	21.3	7.1
Scaffold_335	BMV3_UPD-PK3	RF01113	cm	1	23	16824	16846	-	no	1	0.35	0	20	18
Scaffold_339	CRISPR-DR28	RF01356	cm	1	24	16961	16988	+	no	1	0.57	0	17.3	46
Scaffold_34	snoR160	RF00203	cm	1	80	14905	14982	+	no	1	0.49	0	20.2	42
Scaffold_34	GRIK4_3p_UTR	RF01383	cm	1	86	33524	33600	+	no	1	0.66	0	14.5	77
Scaffold_34	mir-137	RF00694	cm	1	100	35093	35195	+	no	1	0.55	0	26.4	0.055
Scaffold_34	mir-22	RF00653	cm	1	88	67096	67208	+	no	1	0.47	0	23.2	0.43
Scaffold_34	P4	RF01681	cm	1	215	78585	78691	-	no	1	0.64	0	15.4	1.9
Scaffold_34	snR13	RF01223	cm	1	124	105509	105562	+	no	1	0.35	0	21.5	4.9
Scaffold_34	CRISPR-DR39	RF01358	cm	1	31	153009	153038	-	no	1	0.2	0	20.3	42
Scaffold_34	CRISPR-DR40	RF01349	cm	1	30	198555	198585	+	no	1	0.23	0	21.4	24
Scaffold_341	mir-503	RF00753	cm	1	71	8696	8811	+	no	1	0.49	0	45.3	3.7e-07
Scaffold_343	GRIK4_3p_UTR	RF01383	cm	1	86	13860	13923	+	no	1	0.62	0	16	31
Scaffold_346	GRIK4_3p_UTR	RF01383	cm	1	86	3310	3373	-	no	1	0.64	0	17.8	11
Scaffold_346	tRNA	RF00005	cm	1	71	8964	9064	+	no	1	0.54	0	38	4e-05
Scaffold_348	snoZ182	RF00314	cm	1	92	10272	10372	-	no	1	0.35	0	21	4.7
Scaffold_35	mir-242	RF00898	cm	1	72	72381	72428	+	no	1	0.42	0	30.3	0.0066
Scaffold_35	mir-944	RF01024	cm	1	88	74780	74843	+	no	1	0.31	0	23.8	0.94
Scaffold_35	mir-944	RF01024	cm	1	88	76789	76874	-	no	1	0.33	0	42.9	1.4e-05
Scaffold_35	mir-3	RF00716	cm	1	73	77647	77714	-	no	1	0.26	0.1	37.2	5.5e-05
Scaffold_35	mir-556	RF00969	cm	1	95	86184	86268	+	no	1	0.34	0	28.1	0.25
Scaffold_35	SNORD63	RF00154	cm	1	70	90952	91015	+	no	1	0.31	0	19.6	11
Scaffold_35	mir-944	RF01024	cm	1	88	95854	95937	+	no	1	0.32	0	31.9	0.0082
Scaffold_35	SCARNA18	RF00283	cm	1	83	122941	123014	+	no	1	0.5	0	24.2	0.072
Scaffold_35	GRIK4_3p_UTR	RF01383	cm	1	86	135277	135348	-	no	1	0.6	0	12.8	210
Scaffold_350	mir-944	RF01024	cm	1	88	5827	5912	-	no	1	0.36	0	29.4	0.036
Scaffold_353	snoR27	RF01287	cm	1	95	3155	3250	+	no	1	0.33	0	30.9	0.22
Scaffold_354	snoZ223	RF00135	cm	1	94	7461	7553	-	no	1	0.41	0	16.8	52
Scaffold_354	MIR1151	RF00926	cm	1	145	10941	11059	-	no	1	0.66	0	36.6	0.00044
Scaffold_36	MIR1446	RF00954	cm	1	105	25905	26025	+	no	1	0.62	0	21.9	1
Scaffold_36	snR50	RF01190	cm	1	89	40458	40543	+	no	1	0.35	0	22.6	7.6
Scaffold_36	Bacillus-plasmid	RF01691	cm	1	61	50366	50414	-	no	1	0.45	0	19.5	2
Scaffold_36	GRIK4_3p_UTR	RF01383	cm	1	86	121100	121164	+	no	1	0.65	0	17.1	16
Scaffold_36	mir-268	RF00834	cm	1	95	124751	124831	+	no	1	0.52	0	21.6	1.6
Scaffold_36	PK1-TEV_CVMV	RF01102	cm	1	37	161487	161523	+	no	1	0.41	0	20.5	17
Scaffold_360	PK-HAV	RF01096	cm	1	56	5659	5715	+	no	1	0.26	0	20.7	100
Scaffold_362	AMV_RNA1_SL	RF00196	cm	1	35	2146	2207	-	no	1	0.39	0	20.9	11
Scaffold_37	RF_site3	RF01079	cm	1	39	56052	56094	-	no	1	0.49	0	20.5	4.6
Scaffold_37	tRNA	RF00005	cm	1	71	120630	120734	+	no	1	0.44	0	48.3	6.2e-08
Scaffold_37	GRIK4_3p_UTR	RF01383	cm	1	86	122152	122232	+	no	1	0.58	0.1	17.9	11
Scaffold_37	mir-314	RF00807	cm	1	90	157005	157079	-	no	1	0.48	0	20.3	2.8
Scaffold_37	GRIK4_3p_UTR	RF01383	cm	1	86	163740	163771	-	no	1	0.59	0	13.6	130
Scaffold_37	tRNA	RF00005	cm	1	71	173009	173111	-	no	1	0.47	0	50.3	1.8e-08
Scaffold_37	CRISPR-DR8	RF01321	cm	1	37	186532	186567	+	no	1	0.56	0	20.8	1.1
Scaffold_37	GRIK4_3p_UTR	RF01383	cm	1	86	210930	211012	-	no	1	0.58	0	12.4	280
Scaffold_371	SNORD112	RF01169	cm	1	77	10546	10597	-	no	1	0.56	0	20.3	6.7
Scaffold_372	snoJ26	RF00336	cm	1	147	5781	5909	-	no	1	0.48	0	22.6	4.6
Scaffold_373	PK-HAV	RF01096	cm	1	56	1105	1162	-	no	1	0.31	0.1	22.4	46
Scaffold_377	snoMe18S-Um1356	RF00532	cm	1	86	11295	11370	+	no	1	0.29	0.1	24.4	7.2
Scaffold_379	CRISPR-DR32	RF01342	cm	1	37	11884	11918	-	no	1	0.49	0	18.2	38
Scaffold_38	PVX_3	RF00184	cm	1	54	147129	147169	-	no	1	0.51	0	22.4	0.26
Scaffold_38	mir-556	RF00969	cm	1	95	151487	151572	+	no	1	0.33	0	25.9	0.86
Scaffold_38	S_pombe_snR97	RF01451	cm	1	148	152019	152136	+	no	1	0.31	0.2	11.9	1000
Scaffold_38	MIR169_2	RF00645	cm	1	127	153371	153538	-	no	1	0.39	0	33.9	7.9e-06
Scaffold_38	mir-944	RF01024	cm	1	88	157960	158048	+	no	1	0.42	0	23.7	0.97
Scaffold_38	mir-577	RF01013	cm	1	96	165145	165228	+	no	1	0.29	0.1	36.1	0.00018
Scaffold_38	mir-944	RF01024	cm	1	88	165287	165375	-	no	1	0.3	0.1	29.4	0.035
Scaffold_38	mir-556	RF00969	cm	1	95	166383	166450	-	no	1	0.31	0	24.6	1.8
Scaffold_38	MIR1444	RF00956	cm	1	85	170079	170156	-	no	1	0.24	1.1	36.4	0.00024
Scaffold_38	mir-577	RF01013	cm	1	96	205381	205468	-	no	1	0.31	0	24.8	0.19
Scaffold_38	mir-305	RF00732	cm	1	88	207525	207647	-	no	1	0.41	0	22.1	1.2
Scaffold_380	BMV3_UPD-PK3	RF01113	cm	1	23	3513	3535	-	no	1	0.43	0	22.1	5.3
Scaffold_381	CRISPR-DR28	RF01356	cm	1	24	4542	4563	-	no	1	0.77	0	17.5	42
Scaffold_382	snoZ223	RF00135	cm	1	94	9116	9191	-	no	1	0.37	0	17	44
Scaffold_383	TMV_UPD-PK3	RF01072	cm	1	31	4350	4385	+	no	1	0.42	0	26.1	0.013
Scaffold_383	Corona_SL-III	RF00496	cm	1	42	4649	4687	+	no	1	0.36	0	20.7	3.4
Scaffold_383	PSLVbeta_UPD-PK2	RF01110	cm	1	22	5899	5920	+	no	1	0.41	0	20.7	34
Scaffold_384	snoU83D	RF01175	cm	1	81	1895	1954	+	no	1	0.37	0	22.3	1.8
Scaffold_385	rli23	RF01458	cm	1	98	2628	2716	-	no	1	0.43	0	26.8	0.41
Scaffold_385	snoZ169	RF00331	cm	1	69	5532	5589	-	no	1	0.4	0	24.6	1.3
Scaffold_385	mir-331	RF00769	cm	1	94	7433	7521	+	no	1	0.51	0	31.5	0.0022
Scaffold_386	MIR1444	RF00956	cm	1	85	5927	6014	+	no	1	0.28	0.1	36.9	0.00017
Scaffold_386	snoZ199	RF00200	cm	1	84	9884	9952	+	no	1	0.43	0	20.3	21
Scaffold_387	mir-684	RF00876	cm	1	88	11802	11881	+	no	1	0.32	0	20.6	9
Scaffold_39	CRISPR-DR20	RF01333	cm	1	36	47693	47726	+	no	1	0.47	0	23.8	0.25
Scaffold_39	UPD-PKib	RF01080	cm	1	32	110625	110660	-	no	1	0.33	0	21.3	4.1
Scaffold_39	tRNA	RF00005	cm	1	71	123649	123737	+	no	1	0.53	0	48.7	4.9e-08
Scaffold_39	snoZ223	RF00135	cm	1	94	200473	200551	-	no	1	0.43	0	17.9	25
Scaffold_395	mir-944	RF01024	cm	1	88	6456	6544	+	no	1	0.3	0	27.1	0.14
Scaffold_395	snoZ196	RF00134	cm	1	85	11046	11141	-	no	1	0.25	2.6	20.8	37
Scaffold_399	mir-60	RF00849	cm	1	72	640	706	+	no	1	0.48	0	23.1	0.37
Scaffold_4	tRNA	RF00005	cm	1	71	180211	180307	-	no	1	0.43	0	51.9	6.7e-09
Scaffold_4	CRISPR-DR47	RF01360	cm	1	37	183323	183356	-	no	1	0.35	0	27	0.15
Scaffold_4	TB11Cs4H1	RF01539	cm	1	71	184518	184578	-	no	1	0.56	0	17	38
Scaffold_4	snoZ163	RF00317	cm	1	90	221065	221149	-	no	1	0.46	0	20.5	1.1
Scaffold_4	GRIK4_3p_UTR	RF01383	cm	1	86	242543	242640	-	no	1	0.63	0	13.4	150
Scaffold_4	snoZ247	RF00321	cm	1	139	242717	242774	-	no	1	0.52	0	19	6.2
Scaffold_4	SNORD70	RF00575	cm	1	89	553238	553305	+	no	1	0.26	0.2	19.5	50
Scaffold_4	CRISPR-DR37	RF01347	cm	1	35	670658	670696	-	no	1	0.46	0	22	3.3
Scaffold_4	SCARNA8	RF00286	cm	1	131	699899	700034	+	no	1	0.5	0	34.5	0.00087
Scaffold_4	TLS-PK2	RF01077	cm	1	66	760495	760580	+	no	1	0.51	0	23.4	0.77
Scaffold_40	GRIK4_3p_UTR	RF01383	cm	8	40	82152	82183	+	no	1	0.72	0	13.1	180
Scaffold_41	mir-556	RF00969	cm	1	95	91267	91352	-	no	1	0.3	1.7	23.8	2.9
Scaffold_41	tRNA	RF00005	cm	1	71	117063	117150	-	no	1	0.59	0	48.6	5.2e-08
Scaffold_41	SBWMV2_UPD-PKb	RF01104	cm	1	29	136083	136111	-	no	1	0.41	0	24.6	0.2
Scaffold_41	snoZ175	RF00318	cm	1	81	145046	145114	-	no	1	0.36	0	20.4	28
Scaffold_412	FIE3	RF00227	cm	1	65	10937	10980	-	no	1	0.25	0	20.2	53
Scaffold_42	mir-14	RF00752	cm	1	67	31848	31890	-	no	1	0.56	0	20.6	1.2
Scaffold_42	snoZ182	RF00314	cm	1	92	53417	53504	+	no	1	0.4	0	20.3	7.3
Scaffold_42	SNORD77	RF00591	cm	1	68	62240	62298	+	no	1	0.56	0	21.8	4.8
Scaffold_42	BMV3_UPD-PK3	RF01113	cm	1	23	111462	111484	+	no	1	0.3	0	20.5	14
Scaffold_42	mir-192	RF00130	cm	1	106	111925	112023	+	no	1	0.37	0	35.5	3.5e-05
Scaffold_42	snoR14	RF01280	cm	1	84	157175	157262	-	no	1	0.41	0	22.5	0.98
Scaffold_42	SNORD70	RF00575	cm	1	89	187530	187612	+	no	1	0.54	0	19.4	53
Scaffold_422	GRIK4_3p_UTR	RF01383	cm	1	86	10833	10901	+	no	1	0.68	0.1	12.5	260
Scaffold_43	GRIK4_3p_UTR	RF01383	cm	1	86	70110	70157	-	no	1	0.56	0	16.7	22
Scaffold_43	snoZ267	RF00344	cm	1	73	81121	81153	+	no	1	0.3	0	22	1.8
Scaffold_43	S_pombe_snR97	RF01451	cm	35	68	85291	85324	-	no	1	0.24	0	10.3	2300
Scaffold_43	GRIK4_3p_UTR	RF01383	cm	1	86	105571	105651	-	no	1	0.59	0	13.9	110
Scaffold_43	CRISPR-DR16	RF01330	cm	1	37	120957	120989	+	no	1	0.48	0	20.8	0.59
Scaffold_43	suhB	RF00519	cm	1	77	131501	131570	-	no	1	0.46	0.5	22.9	0.2
Scaffold_44	snR62	RF01205	cm	1	100	25071	25169	-	no	1	0.36	0	22.5	130
Scaffold_44	MicF	RF00033	cm	1	94	120859	120928	+	no	1	0.26	0.7	20.5	33
Scaffold_44	S_pombe_snR97	RF01451	cm	1	148	164361	164432	+	no	1	0.26	0.1	12.4	810
Scaffold_445	snoZ175	RF00318	cm	1	81	7682	7743	-	no	1	0.37	0	25.5	2.1
Scaffold_45	BMV3_UPD-PK3	RF01113	cm	1	23	12654	12676	-	no	1	0.26	0	23.3	2.7
Scaffold_45	GRIK4_3p_UTR	RF01383	cm	1	86	23180	23218	+	no	1	0.59	0	12.8	210
Scaffold_45	snoZ159	RF00160	cm	1	87	112115	112189	-	no	1	0.44	0	21.6	3.6
Scaffold_450	mir-944	RF01024	cm	1	88	6406	6494	+	no	1	0.3	0	29.7	0.03
Scaffold_450	mir-944	RF01024	cm	1	88	6756	6858	+	no	1	0.27	1.3	39.2	0.00012
Scaffold_456	mir-684	RF00876	cm	1	88	2	73	+	no	1	0.28	0	18.6	28
Scaffold_456	mir-684	RF00876	cm	1	88	3101	3180	-	no	1	0.31	0	21	6.9
Scaffold_457	CRISPR-DR53	RF01366	cm	1	37	538	592	+	no	1	0.4	0	21.6	2.6
Scaffold_46	CRISPR-DR51	RF01364	cm	1	38	6852	6887	-	no	1	0.53	0	23.9	3.8
Scaffold_46	GRIK4_3p_UTR	RF01383	cm	3	66	172326	172388	-	no	1	0.68	0	14.2	94
Scaffold_46	RNase_MRP	RF00030	cm	1	267	188623	189112	+	no	1	0.58	0	109.8	3.1e-29
Scaffold_461	mir-503	RF00753	cm	1	71	6144	6259	-	no	1	0.47	0	45.3	3.7e-07
Scaffold_461	HLE	RF00437	cm	1	130	6729	6840	+	no	1	0.43	0	20.7	2.2
Scaffold_47	snoZ223	RF00135	cm	1	94	3059	3111	+	no	1	0.3	0	18.2	21
Scaffold_47	tRNA	RF00005	cm	1	71	50160	50268	-	no	1	0.51	0	45.9	2.9e-07
Scaffold_47	snoR26	RF01286	cm	1	94	116953	117026	+	no	1	0.51	0	20.6	7
Scaffold_47	mir-197	RF00707	cm	1	75	145636	145751	-	no	1	0.68	1.1	20.6	10
Scaffold_47	U2	RF00004	cm	1	193	179530	179691	+	no	1	0.45	0	89.1	3.3e-17
Scaffold_47	PK-PYVV	RF01078	cm	1	58	186323	186363	-	no	1	0.24	0	24.1	0.8
Scaffold_474	mir-684	RF00876	cm	1	88	6047	6135	-	no	1	0.25	2.4	16.6	90
Scaffold_48	5S_rRNA	RF00001	cm	1	119	7013	7136	-	no	1	0.48	0	21.3	1.4
Scaffold_48	GRIK4_3p_UTR	RF01383	cm	1	86	53118	53202	-	no	1	0.56	0	13.3	160
Scaffold_48	snoZ169	RF00331	cm	1	69	116208	116271	-	no	1	0.39	0	22.2	4.9
Scaffold_48	GRIK4_3p_UTR	RF01383	cm	1	86	135537	135626	+	no	1	0.48	0	12.6	250
Scaffold_48	CRISPR-DR35	RF01345	cm	1	36	138640	138676	-	no	1	0.65	0	22.1	1.3
Scaffold_48	GRIK4_3p_UTR	RF01383	cm	1	86	157073	157157	+	no	1	0.62	0	14.9	61
Scaffold_48	snoU83C	RF01187	cm	1	86	159802	159884	+	no	1	0.51	0	25.1	0.048
Scaffold_488	BMV3_UPD-PK3	RF01113	cm	1	23	367	389	+	no	1	0.3	0	20.5	14
Scaffold_488	CRISPR-DR49	RF01362	cm	1	47	2993	3027	-	no	1	0.29	0	21.3	8
Scaffold_49	PK1-TEV_CVMV	RF01102	cm	1	37	64527	64563	+	no	1	0.32	0	20.1	22
Scaffold_49	tRNA	RF00005	cm	1	71	76940	77022	+	no	1	0.51	0	36.6	9.5e-05
Scaffold_49	S_pombe_snR97	RF01451	cm	37	62	115409	115435	+	no	1	0.37	0	7	12000
Scaffold_49	S_pombe_snR97	RF01451	cm	1	148	115469	115570	+	no	1	0.33	0	14.9	230
Scaffold_5	MIR529	RF00908	cm	1	131	12990	13074	+	no	1	0.33	0	25.7	0.022
Scaffold_5	mir-876	RF00935	cm	1	81	13209	13337	-	no	1	0.33	0.1	20.1	3.6
Scaffold_5	snoMe28S-Am2634	RF00537	cm	1	97	84821	84875	+	no	1	0.42	0	21.2	12
Scaffold_5	snoR20	RF00351	cm	1	90	87078	87173	-	no	1	0.28	1.9	35.9	0.047
Scaffold_5	mir-576	RF00984	cm	1	98	90426	90508	+	no	1	0.51	0	23.1	0.49
Scaffold_5	tRNA	RF00005	cm	1	71	259669	259785	+	no	1	0.5	0	43.9	9.8e-07
Scaffold_5	snoMe28S-Gm3113	RF00531	cm	1	85	522474	522555	+	no	1	0.44	0	20.7	9.7
Scaffold_5	mir-1497	RF00953	cm	1	74	525466	525540	-	no	1	0.51	0	26.1	0.03
Scaffold_5	mir-684	RF00876	cm	1	88	555342	555435	-	no	1	0.44	0	17.3	59
Scaffold_5	GRIK4_3p_UTR	RF01383	cm	1	86	563019	563090	+	no	1	0.6	0	12.6	240
Scaffold_5	snoJ33	RF00315	cm	1	81	573065	573146	-	no	1	0.49	0	22.6	0.57
Scaffold_5	MIR529	RF00908	cm	1	131	606567	606688	+	no	1	0.39	0	28.5	0.0033
Scaffold_5	mir-607	RF00974	cm	1	96	615772	615875	+	no	1	0.58	0	65.4	7.6e-12
Scaffold_5	GRIK4_3p_UTR	RF01383	cm	1	86	619247	619316	-	no	1	0.61	0.1	14.9	61
Scaffold_5	mir-183	RF00663	cm	1	102	655652	655761	+	no	1	0.44	0	21.1	0.46
Scaffold_5	mir-203	RF00696	cm	1	80	657176	657302	+	no	1	0.45	0	24.9	0.031
Scaffold_50	tRNA	RF00005	cm	1	71	15875	15957	+	no	1	0.55	0	43.5	1.3e-06
Scaffold_50	tRNA	RF00005	cm	1	71	16242	16324	-	no	1	0.55	0	43.5	1.3e-06
Scaffold_50	tRNA	RF00005	cm	1	71	37412	37494	+	no	1	0.59	0	43.5	1.3e-06
Scaffold_50	tRNA	RF00005	cm	1	71	38207	38291	+	no	1	0.51	0	48.8	4.6e-08
Scaffold_50	Telomerase-cil	RF00025	cm	1	178	94612	94786	+	no	1	0.39	0	19.5	17
Scaffold_50	GRIK4_3p_UTR	RF01383	cm	1	86	152408	152480	+	no	1	0.67	0	15.7	37
Scaffold_51	mir-154	RF00641	cm	1	81	4491	4632	+	no	1	0.51	0	26.5	0.072
Scaffold_51	tRNA	RF00005	cm	1	71	52860	52931	-	no	1	0.53	0	58.8	8.9e-11
Scaffold_51	PK-HAV	RF01096	cm	3	36	161259	161292	-	no	1	0.47	0	20.2	130
Scaffold_511	GRIK4_3p_UTR	RF01383	cm	1	86	481	550	-	no	1	0.59	0	18.1	9.2
Scaffold_511	snoZ223	RF00135	cm	1	94	785	899	+	no	1	0.43	0	18.7	16
Scaffold_517	gabT	RF01738	cm	1	61	621	673	-	no	1	0.53	0	20.6	15
Scaffold_52	mir-563	RF01003	cm	1	79	76165	76245	+	no	1	0.46	0	21.4	2
Scaffold_52	tRNA	RF00005	cm	1	71	92139	92219	+	no	1	0.58	0	49	4.1e-08
Scaffold_52	SNORD14	RF00016	cm	1	116	139968	140165	+	no	1	0.51	0	32.5	0.0014
Scaffold_52	snoR160	RF00203	cm	1	80	169888	169973	+	no	1	0.44	0	20.6	34
Scaffold_52	snoMe28S-Gm3113	RF00531	cm	1	85	175110	175191	-	no	1	0.34	0	21	8.4
Scaffold_52	tRNA	RF00005	cm	1	71	175873	175953	+	no	1	0.58	0	49	4.1e-08
Scaffold_53	GRIK4_3p_UTR	RF01383	cm	1	86	20191	20264	-	no	1	0.57	0	13.9	110
Scaffold_53	Histone3	RF00032	cm	1	46	70352	70414	-	no	1	0.41	0	24.7	0.013
Scaffold_53	mir-1473	RF00993	cm	1	84	83573	83680	-	no	1	0.56	0	20.5	3.9
Scaffold_53	snoR53	RF00338	cm	1	91	90440	90490	-	no	1	0.37	0	23.3	20
Scaffold_53	snoR53	RF00338	cm	1	91	90522	90572	-	no	1	0.35	0	20.9	61
Scaffold_53	mir-207	RF00802	cm	1	79	136652	136711	-	no	1	0.68	0	20.1	15
Scaffold_531	mir-944	RF01024	cm	1	88	1561	1663	+	no	1	0.28	0.5	34.5	0.0018
Scaffold_535	mir-503	RF00753	cm	1	71	368	483	+	no	1	0.51	0	45.2	4e-07
Scaffold_54	mir-9	RF00237	cm	1	62	4565	4618	+	no	1	0.37	0	27.6	0.029
Scaffold_54	mir-268	RF00834	cm	1	95	44254	44328	-	no	1	0.52	0	25.1	0.19
Scaffold_54	TLS-PK2	RF01077	cm	1	66	46251	46319	-	no	1	0.57	0	23.7	0.65
Scaffold_54	MIR1444	RF00956	cm	1	85	79207	79287	+	no	1	0.42	0	21.3	2.9
Scaffold_54	tRNA	RF00005	cm	1	71	82777	82859	-	no	1	0.59	0	45.7	3.2e-07
Scaffold_54	snoR14	RF01280	cm	1	84	125426	125493	-	no	1	0.37	0	22.2	1.1
Scaffold_55	mir-136	RF00687	cm	1	83	12489	12583	-	no	1	0.53	0	26.3	0.18
Scaffold_55	GRIK4_3p_UTR	RF01383	cm	1	86	13149	13220	+	no	1	0.56	0	13.4	150
Scaffold_55	GRIK4_3p_UTR	RF01383	cm	1	86	45225	45310	+	no	1	0.7	4.7	13.2	170
Scaffold_55	GRIK4_3p_UTR	RF01383	cm	1	86	64998	65043	+	no	1	0.5	0	17.9	10
Scaffold_55	mir-576	RF00984	cm	1	98	72749	72831	+	no	1	0.51	0	23.1	0.49
Scaffold_55	CRISPR-DR39	RF01358	cm	1	31	90293	90323	+	no	1	0.35	0	20.3	42
Scaffold_55	snoZ152	RF00350	cm	1	109	112972	113056	+	no	1	0.46	0	20.1	9.2
Scaffold_55	mir-944	RF01024	cm	1	88	142828	142908	-	no	1	0.38	0	26	0.25
Scaffold_55	mir-577	RF01013	cm	1	96	142998	143083	-	no	1	0.3	0	20.6	2.6
Scaffold_55	mir-944	RF01024	cm	1	88	148350	148458	+	no	1	0.3	0.4	41.3	3.4e-05
Scaffold_55	mir-556	RF00969	cm	1	95	157847	157963	+	no	1	0.24	8.8	32.8	0.018
Scaffold_55	snoZ223	RF00135	cm	1	94	160341	160408	+	no	1	0.37	0	17	45
Scaffold_55	mir-556	RF00969	cm	1	95	165524	165629	-	no	1	0.27	1.2	29.6	0.11
Scaffold_550	snoZ196	RF00134	cm	1	85	2930	3013	+	no	1	0.27	0.3	20	55
Scaffold_558	SBWMV2_UPD-PKl	RF01105	cm	1	27	2404	2434	-	no	1	0.29	0	27.4	1.2
Scaffold_56	tRNA	RF00005	cm	1	71	11269	11351	-	no	1	0.52	0	46.9	1.6e-07
Scaffold_56	tRNA	RF00005	cm	1	71	75735	75815	+	no	1	0.54	0	52.9	3.6e-09
Scaffold_56	tRNA	RF00005	cm	1	71	76305	76385	+	no	1	0.54	0	52.9	3.6e-09
Scaffold_56	tRNA	RF00005	cm	1	71	104229	104309	-	no	1	0.54	0	52.9	3.6e-09
Scaffold_56	tRNA	RF00005	cm	1	71	117853	117933	+	no	1	0.54	0	52.9	3.6e-09
Scaffold_56	mir-133	RF00446	cm	1	87	120669	120745	-	no	1	0.35	0	21.3	0.22
Scaffold_56	SBWMV1_UPD-PKh	RF01082	cm	1	25	124673	124697	-	no	1	0.48	0	20.4	3.4
Scaffold_56	snoR4a	RF01301	cm	1	77	141671	141726	+	no	1	0.36	0	20.2	11
Scaffold_564	GRIK4_3p_UTR	RF01383	cm	1	86	3086	3149	-	no	1	0.55	0	15.3	50
Scaffold_569	snoZ223	RF00135	cm	1	94	622	675	-	no	1	0.5	0	18.2	21
Scaffold_57	snoU43C	RF01154	cm	1	66	7849	7903	-	no	1	0.27	0	20.3	35
Scaffold_57	snoR17	RF01289	cm	1	110	77380	77481	-	no	1	0.38	0	20.9	16
Scaffold_57	IFN_gamma	RF00259	cm	1	169	83319	83443	-	no	1	0.38	0	23.2	1.4
Scaffold_57	mir-944	RF01024	cm	1	88	101266	101357	-	no	1	0.3	0	27.8	0.091
Scaffold_57	mir-944	RF01024	cm	1	88	101411	101485	-	no	1	0.27	0.4	32	0.0076
Scaffold_57	SNORD37	RF00440	cm	1	65	103481	103530	-	no	1	0.3	0	23.1	5.5
Scaffold_57	mir-684	RF00876	cm	1	88	137255	137332	+	no	1	0.33	0	26.4	0.28
Scaffold_570	snoU43C	RF01154	cm	1	66	3042	3096	+	no	1	0.27	0	20.3	35
Scaffold_573	mir-684	RF00876	cm	1	88	2916	3009	-	no	1	0.4	0	18	39
Scaffold_574	snoZ196	RF00134	cm	1	85	1111	1170	+	no	1	0.45	0	21.7	23
Scaffold_575	CRISPR-DR56	RF01369	cm	1	37	297	324	-	no	1	0.5	0	23	0.74
Scaffold_576	CRISPR-DR8	RF01321	cm	1	37	2787	2811	-	no	1	0.48	0	16.2	25
Scaffold_58	snoMe28S-Cm3227	RF00536	cm	1	82	3681	3757	+	no	1	0.4	0	21.8	17
Scaffold_58	snoZ278	RF00201	cm	1	115	13204	13261	-	no	1	0.43	0	22.5	0.64
Scaffold_58	snoMe28S-G3255	RF00527	cm	1	84	79690	79742	+	no	1	0.38	0	21.6	75
Scaffold_58	tRNA	RF00005	cm	1	71	131884	131965	+	no	1	0.55	0	48.9	4.3e-08
Scaffold_58	SNORD95	RF00189	cm	1	68	163715	163777	-	no	1	0.43	0	22.1	0.48
Scaffold_58	snosnR60_Z15	RF00309	cm	1	98	166859	166966	-	no	1	0.35	0	21.7	10
Scaffold_58	snoR160	RF00203	cm	1	80	172008	172093	+	no	1	0.44	0	22.3	14
Scaffold_59	isrK	RF01394	cm	1	77	166834	166907	+	no	1	0.68	0	24	0.083
Scaffold_591	snoU43C	RF01154	cm	1	66	12	66	-	no	1	0.27	0	20.3	35
Scaffold_595	mir-556	RF00969	cm	1	95	2373	2459	-	no	1	0.31	0	33.4	0.013
Scaffold_6	mir-286	RF00789	cm	1	100	38238	38338	+	no	1	0.45	0	43.8	1.5e-07
Scaffold_6	tRNA	RF00005	cm	1	71	80414	80518	+	no	1	0.46	0	51.1	1.1e-08
Scaffold_6	snR62	RF01205	cm	1	100	215894	216001	-	no	1	0.36	0	20.7	290
Scaffold_6	Flavo-1	RF01705	cm	1	76	249799	249866	-	no	1	0.54	0	19.5	2
Scaffold_6	mir-268	RF00834	cm	1	95	363228	363308	-	no	1	0.43	0	21.4	1.8
Scaffold_6	CRISPR-DR47	RF01360	cm	1	37	458838	458874	-	no	1	0.43	0	21.9	2.4
Scaffold_6	sR40	RF01297	cm	1	61	564318	564355	-	no	1	0.58	0	21.7	0.25
Scaffold_6	GRIK4_3p_UTR	RF01383	cm	1	86	596501	596589	-	no	1	0.56	0	16	31
Scaffold_6	snoR160	RF00203	cm	1	80	658271	658343	+	no	1	0.34	0	22.3	14
Scaffold_6	mir-399	RF00445	cm	1	118	680276	680403	-	no	1	0.44	0	31.2	0.00016
Scaffold_6	tRNA	RF00005	cm	1	71	682176	682277	+	no	1	0.52	0	45.1	4.8e-07
Scaffold_60	mir-449	RF00711	cm	1	90	1604	1724	+	no	1	0.48	0	28.2	0.0016
Scaffold_60	SNORD24	RF00069	cm	1	76	71031	71112	+	no	1	0.37	0	35.7	0.003
Scaffold_60	snoZ223	RF00135	cm	1	94	77879	77961	+	no	1	0.37	0	16.9	48
Scaffold_60	snoU43C	RF01154	cm	1	66	103140	103191	-	no	1	0.35	0	21.4	19
Scaffold_601	snoR53Y	RF01279	cm	1	79	2171	2252	-	no	1	0.34	0	20.1	9.2
Scaffold_61	rseX	RF01401	cm	1	95	124979	125044	-	no	1	0.41	0	25.6	3.8
Scaffold_61	CRISPR-DR53	RF01366	cm	1	37	136683	136728	+	no	1	0.5	0	21.5	2.8
Scaffold_617	PVX_3	RF00184	cm	1	54	1344	1387	+	no	1	0.32	0	21	0.59
Scaffold_62	snoR79	RF00323	cm	1	65	97518	97595	-	no	1	0.41	0	20	3.4
Scaffold_62	GRIK4_3p_UTR	RF01383	cm	1	86	114415	114493	-	no	1	0.68	0	21.8	0.99
Scaffold_63	RF_site2	RF01076	cm	1	72	32513	32572	+	no	1	0.53	0	26.9	0.16
Scaffold_63	mir-638	RF00978	cm	1	100	52699	52784	+	no	1	0.62	0	22.7	9.2
Scaffold_63	ceN68	RF01650	cm	1	121	81141	81251	+	no	1	0.38	0	20.1	8
Scaffold_63	CRISPR-DR56	RF01369	cm	1	37	127179	127248	+	no	1	0.4	0	20.9	2.7
Scaffold_63	SNORD63	RF00154	cm	1	70	131648	131710	-	no	1	0.41	0	27.2	0.13
Scaffold_633	CRISPR-DR35	RF01345	cm	1	36	274	308	-	no	1	0.51	0	20.5	3.6
Scaffold_636	tRNA	RF00005	cm	1	71	97	169	-	no	1	0.62	0	55.9	5.4e-10
Scaffold_636	SSU_rRNA_bacteria	RF00177	cm	1	1531	241	1780	-	no	1	0.55	19.2	1584.9	0
Scaffold_64	snoR53Y	RF01279	cm	1	79	68186	68261	+	no	1	0.36	0	19	18
Scaffold_642	GRIK4_3p_UTR	RF01383	cm	1	86	1608	1690	+	no	1	0.66	0	13.3	160
Scaffold_646	snoMe18S-Um1356	RF00532	cm	1	86	185	271	-	no	1	0.34	0	21.5	30
Scaffold_65	SNORD63	RF00154	cm	1	70	46625	46656	-	no	1	0.5	0	21.1	4.5
Scaffold_65	U2	RF00004	cm	1	193	65725	65913	+	no	1	0.49	0	112.6	7.3e-23
Scaffold_65	SNORD64	RF00570	cm	1	67	88431	88490	+	no	1	0.45	0	24.9	0.33
Scaffold_65	CRISPR-DR28	RF01356	cm	1	24	122979	123004	+	no	1	0.77	0	16.8	63
Scaffold_657	MIR807	RF00886	cm	1	176	1451	1626	+	no	1	0.33	0.7	73.5	2.4e-13
Scaffold_66	mir-383	RF00715	cm	1	73	10727	10770	+	no	1	0.59	0	20.4	0.78
Scaffold_66	GRIK4_3p_UTR	RF01383	cm	1	86	52046	52125	+	no	1	0.61	0	14.1	100
Scaffold_66	MIR444	RF00920	cm	1	151	111079	111205	+	no	1	0.34	0	61.2	3.3e-11
Scaffold_66	mir-616	RF00995	cm	1	97	119196	119287	-	no	1	0.27	0.4	28.1	0.036
Scaffold_66	snoR11	RF00349	cm	1	90	151067	151172	-	no	1	0.44	0	23.9	1.6
Scaffold_67	ctRNA_pT181	RF00242	cm	1	94	35143	35223	-	no	1	0.38	0	21.7	43
Scaffold_67	mir-638	RF00978	cm	1	100	42691	42776	-	no	1	0.65	0	21.3	18
Scaffold_67	U2	RF00004	cm	1	193	68050	68238	-	no	1	0.48	0	111.5	1.4e-22
Scaffold_67	snR62	RF01205	cm	1	100	81816	81878	-	no	1	0.43	0	21.3	220
Scaffold_67	rox2	RF01666	cm	1	71	84127	84194	+	no	1	0.34	0	20.7	12
Scaffold_67	CRISPR-DR53	RF01366	cm	1	37	109247	109283	-	no	1	0.54	0	20	6.8
Scaffold_678	mir-944	RF01024	cm	1	88	1067	1152	-	no	1	0.34	0	26.9	0.15
Scaffold_68	snR56	RF01188	hmm	5	83	21770	21834	-	-	6	0.42	0	25.7	0.00035
Scaffold_68	snoZ178	RF00306	cm	1	152	48832	48985	+	no	1	0.57	0	26.3	0.047
Scaffold_68	U6	RF00026	cm	1	104	120998	121118	-	no	1	0.45	0	89.4	3.4e-21
Scaffold_68	U6	RF00026	cm	1	104	127704	127822	+	no	1	0.45	0	89.1	4.3e-21
Scaffold_68	U6	RF00026	cm	1	104	132753	132873	-	no	1	0.45	0	89.4	3.4e-21
Scaffold_68	U6	RF00026	cm	1	104	134844	134964	-	no	1	0.45	0	89.4	3.4e-21
Scaffold_68	HIV-1_SD	RF01380	cm	1	19	152967	152984	+	no	1	0.61	0	20.1	2.6
Scaffold_683	SNORD37	RF00440	cm	1	65	491	553	+	no	1	0.33	0	20.7	17
Scaffold_683	mir-638	RF00978	cm	1	100	828	929	-	no	1	0.68	0	20.6	26
Scaffold_684	PK-G12rRNA	RF01118	cm	1	108	649	756	-	no	1	0.56	0	108.2	3e-26
Scaffold_69	snoZ223	RF00135	cm	1	94	22527	22613	+	no	1	0.41	0	18.3	20
Scaffold_69	MIR167_1	RF00640	cm	1	118	24942	25231	+	no	1	0.39	0	34.4	0.00012
Scaffold_69	snoZ39	RF00341	cm	1	63	66942	66997	-	no	1	0.39	0	20.4	6.2
Scaffold_69	mir-458	RF00750	cm	1	78	73487	73564	+	no	1	0.55	0	21.3	1.1
Scaffold_69	snoZ169	RF00331	cm	1	69	140236	140273	+	no	1	0.5	0	22.4	4.5
Scaffold_699	SNORD112	RF01169	cm	1	77	162	213	-	no	1	0.52	0	22.5	1.8
Scaffold_7	snoR53	RF00338	cm	1	91	20655	20737	-	no	1	0.45	0	22.2	33
Scaffold_7	tRNA	RF00005	cm	1	71	115102	115196	+	no	1	0.52	0	47.4	1.1e-07
Scaffold_7	P10	RF01668	cm	1	72	117096	117174	-	no	1	0.57	0	19.7	0.48
Scaffold_7	tRNA	RF00005	cm	1	71	117556	117650	+	no	1	0.52	0	47.4	1.1e-07
Scaffold_7	GRIK4_3p_UTR	RF01383	cm	1	86	154418	154482	-	no	1	0.63	0	13.1	180
Scaffold_7	FIE3	RF00227	cm	1	65	177861	177941	-	no	1	0.44	0	23.3	13
Scaffold_7	GRIK4_3p_UTR	RF01383	cm	3	63	206191	206248	-	no	1	0.67	0	15.8	37
Scaffold_7	mir-136	RF00687	cm	1	83	230468	230516	+	no	1	0.63	0	21.9	2.4
Scaffold_7	snoMe28S-Am982	RF00535	cm	1	80	230961	231028	-	no	1	0.35	0	20.4	13
Scaffold_7	tRNA	RF00005	cm	1	71	278773	278887	-	no	1	0.51	0	54.2	1.6e-09
Scaffold_7	SNORD57	RF00274	cm	44	69	296202	296227	+	no	1	0.38	0	24.9	0.1
Scaffold_7	tRNA	RF00005	cm	1	71	402544	402626	-	no	1	0.46	0	54.6	1.3e-09
Scaffold_7	SNORD16	RF00138	cm	1	100	454456	454553	+	no	1	0.35	0	24.6	0.52
Scaffold_7	snoZ40	RF00342	cm	1	73	512128	512184	-	no	1	0.4	0	21	2
Scaffold_7	5S_rRNA	RF00001	cm	1	119	560816	560905	+	no	1	0.52	0	18.2	8.9
Scaffold_7	snoU83B	RF00593	cm	1	94	564806	564861	+	no	1	0.61	0	22.1	0.56
Scaffold_70	CRISPR-DR29	RF01340	cm	1	37	5087	5144	-	no	1	0.64	0	24.2	0.14
Scaffold_70	snR50	RF01190	cm	1	89	28254	28334	+	no	1	0.41	0	21.4	14
Scaffold_70	Rota_CRE	RF00501	cm	1	68	51806	51872	+	no	1	0.46	0	22.9	0.61
Scaffold_70	mir-305	RF00732	cm	1	88	54636	54728	-	no	1	0.44	0	26.2	0.08
Scaffold_70	mir-316	RF00814	cm	1	89	90207	90278	-	no	1	0.32	0	32.8	0.0009
Scaffold_70	snoZ206	RF00312	cm	1	129	91625	91745	-	no	1	0.58	0	26.8	0.17
Scaffold_70	snoR14	RF01280	cm	1	84	122483	122546	+	no	1	0.47	0	26	0.11
Scaffold_70	mir-154	RF00641	cm	1	81	147798	147939	-	no	1	0.53	0	26.5	0.072
Scaffold_72	S_pombe_snR97	RF01451	cm	38	61	5035	5058	-	no	1	0.5	0	8.4	5800
Scaffold_72	sn3071	RF01166	cm	1	77	82142	82188	+	no	1	0.45	0	20.6	1.9
Scaffold_72	snoR160	RF00203	cm	1	80	132903	132979	-	no	1	0.42	0	20.9	29
Scaffold_73	HHBV_epsilon	RF01313	cm	1	57	18352	18390	+	no	1	0.62	0	21.9	0.9
Scaffold_73	snoZ102_R77	RF00359	cm	1	88	147890	147974	+	no	1	0.33	0	22.5	11
Scaffold_74	snoZ194	RF00327	cm	1	108	27235	27282	+	no	1	0.58	0	23.5	2.9
Scaffold_74	snoZ102_R77	RF00359	cm	1	88	141624	141687	+	no	1	0.33	0	20.7	30
Scaffold_741	snoU43C	RF01154	cm	1	66	1202	1256	-	no	1	0.29	0	20.3	34
Scaffold_755	mir-154	RF00641	cm	1	81	613	754	-	no	1	0.51	0	23.8	0.39
Scaffold_76	MIR475	RF00721	cm	1	124	107362	107422	+	no	1	0.3	0	23.8	0.62
Scaffold_76	SNORD112	RF01169	cm	1	77	135614	135665	-	no	1	0.56	0	20.3	6.7
Scaffold_770	TCV_H5	RF00500	cm	1	42	1185	1231	+	no	3	0.49	0	21	2.3
Scaffold_79	RNase_MRP	RF00030	cm	1	267	40115	40197	-	no	1	0.59	0	19.8	0.029
Scaffold_79	mir-583	RF00976	cm	1	75	96017	96081	-	no	1	0.48	0	25.9	0.052
Scaffold_8	snoR160	RF00203	cm	1	80	10777	10843	+	no	1	0.34	0	21	28
Scaffold_8	snoMe28S-Am2589	RF00529	cm	1	109	18033	18101	-	no	1	0.57	0	21.6	15
Scaffold_8	GRIK4_3p_UTR	RF01383	cm	1	86	68688	68764	-	no	1	0.58	0	19.4	4.1
Scaffold_8	snoZ206	RF00312	cm	1	129	94297	94422	-	no	1	0.55	0	26.5	0.2
Scaffold_8	snoZ206	RF00312	cm	1	129	95958	96083	-	no	1	0.53	0	25.7	0.3
Scaffold_8	tRNA	RF00005	cm	1	71	150102	150182	+	no	1	0.49	0	51.1	1.1e-08
Scaffold_8	RUF1	RF01578	cm	1	264	386018	386135	-	no	1	0.31	0.1	23.3	0.52
Scaffold_8	CRISPR-DR51	RF01364	cm	1	38	413263	413299	+	no	1	0.24	0	22.8	6.8
Scaffold_8	HHBV_epsilon	RF01313	cm	1	57	476590	476641	-	no	1	0.46	0	22.7	0.55
Scaffold_8	U54	RF00206	cm	1	81	548368	548441	-	no	1	0.34	0	23.6	1.3
Scaffold_8	snR13	RF01223	cm	21	122	561132	561224	-	no	1	0.43	0	26.2	0.4
Scaffold_8	tRNA	RF00005	cm	1	71	574617	574717	+	no	1	0.53	0	54.9	1e-09
Scaffold_8	mir-136	RF00687	cm	1	83	634410	634479	-	no	1	0.49	0	21.3	3.4
Scaffold_80	mir-607	RF00974	cm	1	96	7772	7860	+	no	1	0.58	0	60.2	1.7e-10
Scaffold_80	mir-450	RF00708	cm	11	79	119785	119876	-	no	1	0.26	1	32.8	0.015
Scaffold_808	mir-324	RF01063	cm	1	84	710	820	-	no	1	0.51	0	26.6	0.037
Scaffold_81	mir-554	RF01032	cm	1	96	16021	16135	+	no	1	0.5	0	22.7	0.61
Scaffold_81	snoU43C	RF01154	cm	1	66	30878	30932	-	no	1	0.27	0	20.3	35
Scaffold_81	mir-282	RF00724	cm	1	95	31292	31427	+	no	1	0.41	0	30.2	0.012
Scaffold_81	snoU43C	RF01154	cm	1	66	37582	37636	-	no	1	0.27	0	20.3	35
Scaffold_81	snR62	RF01205	cm	1	100	38821	38902	+	no	1	0.28	0.1	21.3	220
Scaffold_81	snoR160	RF00203	cm	1	80	40953	41012	-	no	1	0.32	0	21.3	24
Scaffold_81	rox2	RF01666	cm	1	71	53218	53286	+	no	1	0.38	0	21.7	6.4
Scaffold_81	snoMe28S-Am2589	RF00529	cm	1	109	113667	113762	-	no	1	0.42	0	21	20
Scaffold_82	SNORD34	RF00147	cm	1	81	5571	5651	-	no	1	0.41	0	20.1	15
Scaffold_82	mir-556	RF00969	cm	1	95	5946	6013	+	no	1	0.29	0	26.7	0.56
Scaffold_82	GRIK4_3p_UTR	RF01383	cm	1	86	112543	112582	+	no	1	0.52	0	16.8	20
Scaffold_82	tRNA	RF00005	cm	1	71	129816	129947	+	no	1	0.55	0	26.1	0.07
Scaffold_820	mir-315	RF00717	cm	1	84	917	987	+	no	1	0.24	0.8	20.1	5.9
Scaffold_83	SNORD70	RF00575	cm	1	89	2523	2596	+	no	1	0.38	0	21.7	17
Scaffold_83	snoZ196	RF00134	cm	1	85	12125	12184	+	no	1	0.43	0	22.1	19
Scaffold_83	SNORD112	RF01169	cm	1	77	17746	17822	+	no	1	0.44	0	21.6	3.1
Scaffold_83	CRISPR-DR59	RF01372	cm	1	37	20277	20309	-	no	1	0.67	0	20.3	2.7
Scaffold_83	PK1-TEV_CVMV	RF01102	cm	1	37	34334	34371	-	no	1	0.37	0	21.1	12
Scaffold_83	mir-876	RF00935	cm	1	81	48057	48158	-	no	1	0.55	0	41.7	4.5e-06
Scaffold_83	snoZ223	RF00135	cm	1	94	53862	53956	-	no	1	0.46	0	19.7	8.6
Scaffold_83	GRIK4_3p_UTR	RF01383	cm	9	40	56964	56994	-	no	1	0.61	0	12.8	220
Scaffold_83	GRIK4_3p_UTR	RF01383	cm	1	86	61300	61367	-	no	1	0.66	0	13	200
Scaffold_83	snoZ155	RF00326	cm	1	81	128134	128181	-	no	1	0.38	0	20	45
Scaffold_84	mir-154	RF00641	cm	1	81	1869	1947	+	no	1	0.41	0	23.5	0.47
Scaffold_84	snoZ13_snr52	RF00335	cm	1	101	75592	75692	+	no	1	0.39	0	23.5	0.94
Scaffold_84	SBWMV1_UPD-PKb	RF01106	cm	1	25	102585	102609	+	no	1	0.52	0	22.1	7.6
Scaffold_85	CRISPR-DR40	RF01349	cm	1	30	103952	104009	+	no	1	0.45	0	21.3	24
Scaffold_85	tRNA	RF00005	cm	1	71	128849	128952	-	no	1	0.57	0	53.3	2.9e-09
Scaffold_86	snoR72	RF00208	cm	1	87	2586	2675	+	no	1	0.49	0	22.8	15
Scaffold_86	snoMe18S-Gm1358	RF00533	cm	1	78	13741	13771	+	no	1	0.45	0	21.9	1.1
Scaffold_86	CRISPR-DR56	RF01369	cm	1	37	19295	19322	-	no	1	0.5	0	23	0.74
Scaffold_86	mir-605	RF01011	cm	1	84	24399	24512	+	no	1	0.49	0	26.7	0.047
Scaffold_86	mir-581	RF00961	cm	1	96	108965	109028	-	no	1	0.42	0	23.8	0.54
Scaffold_86	mir-137	RF00694	cm	1	100	119863	119949	-	no	1	0.39	0	26.2	0.065
Scaffold_86	GRIK4_3p_UTR	RF01383	cm	1	86	130526	130602	+	no	1	0.53	0	14.4	81
Scaffold_87	snoZ5	RF01226	cm	1	113	4395	4499	+	no	1	0.41	0	21.2	8.3
Scaffold_87	SBRMV1_UPD-PKf	RF01107	cm	1	27	23961	23987	+	no	1	0.52	0	24.4	0.4
Scaffold_87	snoZ13_snr52	RF00335	cm	1	101	80024	80119	-	no	1	0.46	0	81.1	6.9e-16
Scaffold_87	snoZ102_R77	RF00359	cm	1	88	80263	80342	-	no	1	0.32	0	21.5	19
Scaffold_87	GRIK4_3p_UTR	RF01383	cm	1	86	104723	104795	+	no	1	0.55	0	14.1	100
Scaffold_87	CRISPR-DR8	RF01321	cm	1	37	122099	122135	-	no	1	0.46	0	17.8	8.4
Scaffold_88	mir-581	RF00961	cm	1	96	126606	126702	-	no	1	0.36	0	52.4	1.8e-08
Scaffold_89	PK-HAV	RF01096	cm	1	56	18981	19026	-	no	1	0.33	0	22.1	54
Scaffold_89	tRNA	RF00005	cm	1	71	89913	90006	+	no	1	0.5	0	49.6	2.9e-08
Scaffold_9	SNORD70	RF00575	cm	1	89	38166	38230	+	no	1	0.48	0	19.4	52
Scaffold_9	RUF1	RF01578	cm	1	264	51213	51437	+	no	1	0.38	0	26.3	0.11
Scaffold_9	mir-556	RF00969	cm	1	95	59224	59291	-	no	1	0.29	0	24	2.5
Scaffold_9	mir-556	RF00969	cm	1	95	59657	59724	+	no	1	0.29	0	24	2.5
Scaffold_9	mir-3	RF00716	cm	1	73	75955	76033	-	no	1	0.32	0	34.7	0.00029
Scaffold_9	S_pombe_snR97	RF01451	cm	1	148	87270	87380	-	no	1	0.37	0	10.1	2600
Scaffold_9	GRIK4_3p_UTR	RF01383	cm	1	86	119224	119287	-	no	1	0.59	0	12.8	220
Scaffold_9	CRISPR-DR28	RF01356	cm	1	24	119785	119801	-	no	1	0.65	0	18.3	27
Scaffold_9	GRIK4_3p_UTR	RF01383	cm	1	86	153139	153212	-	no	1	0.51	0	16.2	29
Scaffold_9	snoZ173	RF00313	cm	1	107	330905	330993	-	no	1	0.48	0	20.3	7.1
Scaffold_9	S_pombe_snR97	RF01451	cm	37	67	407207	407237	+	no	1	0.39	0	8.9	4700
Scaffold_9	GRIK4_3p_UTR	RF01383	cm	1	86	447517	447568	+	no	1	0.63	0	12.6	240
Scaffold_9	snoZ185	RF00320	cm	1	86	452128	452222	-	no	1	0.39	0	22.1	0.41
Scaffold_9	BLV_package	RF00192	cm	1	55	487408	487469	-	no	1	0.6	0	21.4	0.51
Scaffold_9	snosnR61	RF00476	hmm	6	84	517136	517217	+	-	6	0.45	0	31.5	4.9e-06
Scaffold_9	S_pombe_snR97	RF01451	cm	31	72	521745	521786	-	no	1	0.29	0	7.6	8700
Scaffold_9	RF_site6	RF01094	cm	1	118	541432	541492	-	no	1	0.34	0	23.9	4.1
Scaffold_9	mir-944	RF01024	cm	1	88	545104	545190	-	no	1	0.26	0.5	51.5	8.9e-08
Scaffold_9	CRISPR-DR2	RF01315	cm	1	30	546544	546569	-	no	1	0.27	0	22.4	3.9
Scaffold_90	UPD-PKg	RF01112	cm	1	21	3329	3349	-	no	1	0.67	0	20.3	7.9
Scaffold_90	sn3071	RF01166	cm	1	77	43841	43910	-	no	1	0.36	0	20.5	2
Scaffold_90	SNORA74	RF00090	cm	1	201	67496	67714	+	no	1	0.53	0	41.8	8.9e-08
Scaffold_90	SNORA74	RF00090	cm	1	201	68184	68402	+	no	1	0.53	0	43.1	3.8e-08
Scaffold_91	tRNA	RF00005	cm	1	71	17259	17346	-	no	1	0.5	0	29.4	0.0088
Scaffold_91	TPP	RF00059	cm	1	106	29941	30037	+	no	1	0.53	0	60.6	4.6e-10
Scaffold_91	Bacillus-plasmid	RF01691	cm	1	61	30814	30900	+	no	1	0.56	0	18.4	4.1
Scaffold_91	Pox_AX_element	RF00384	cm	1	62	79442	79500	-	no	1	0.47	0	27.3	0.45
Scaffold_91	SNORD96	RF00055	cm	1	85	79530	79611	-	no	1	0.39	0	26.9	0.12
Scaffold_92	nos_TCE	RF00161	cm	1	64	36224	36275	+	no	1	0.31	0	20.5	4
Scaffold_92	mir-556	RF00969	cm	1	95	36738	36805	+	no	1	0.32	0	23.2	4
Scaffold_92	snoZ247	RF00321	cm	1	139	39456	39527	-	no	1	0.46	0	18.4	8.5
Scaffold_92	S_pombe_snR97	RF01451	cm	40	59	90344	90363	-	no	1	0.4	0	8.5	5700
Scaffold_92	tRNA	RF00005	cm	1	71	97815	97886	+	no	1	0.53	0	58.8	8.9e-11
Scaffold_92	tRNA	RF00005	cm	1	71	112635	112723	-	no	1	0.46	0	29.1	0.011
Scaffold_93	tRNA	RF00005	cm	1	71	15344	15429	+	no	1	0.5	0	48.5	5.6e-08
Scaffold_93	MIR529	RF00908	cm	1	131	30368	30489	+	no	1	0.39	0	33.3	0.00013
Scaffold_93	snoZ155	RF00326	cm	1	81	85153	85218	-	no	1	0.32	0	21.2	24
Scaffold_93	CRISPR-DR28	RF01356	cm	1	24	90193	90216	-	no	1	0.71	0	20.8	6.6
Scaffold_94	GRIK4_3p_UTR	RF01383	cm	3	50	14497	14544	+	no	1	0.71	0	12.4	270
Scaffold_94	SNORD43	RF00221	cm	1	92	47996	48075	+	no	1	0.45	0	23.4	0.17
Scaffold_94	SNORD43	RF00221	cm	1	92	49740	49819	+	no	1	0.45	0	23.4	0.17
Scaffold_94	tRNA	RF00005	cm	1	71	67777	67893	+	no	1	0.52	0	52.1	5.9e-09
Scaffold_95	RF_site6	RF01094	cm	1	118	16984	17069	-	no	1	0.41	0	21	18
Scaffold_95	SNORD42	RF00150	cm	1	68	85334	85399	-	no	1	0.36	0	29	0.27
Scaffold_95	mir-996	RF00948	cm	1	98	98655	98743	-	no	1	0.56	0	36.7	2.1e-05
Scaffold_95	mir-554	RF01032	cm	1	96	114157	114218	-	no	1	0.47	0	20.4	2.6
Scaffold_96	IRES_APC	RF00462	cm	1	53	97643	97673	-	no	1	0.45	0	20.3	3.2
Scaffold_97	ctRNA_pND324	RF00238	cm	1	86	30766	30815	+	no	1	0.44	0	20.3	43
Scaffold_97	U2	RF00004	cm	1	193	33865	34054	-	no	1	0.46	0	108.2	8.4e-22
Scaffold_97	mir-576	RF00984	cm	1	98	103065	103147	+	no	1	0.52	0	22.9	0.54
Scaffold_97	MIR1446	RF00954	cm	1	105	109432	109558	+	no	1	0.57	0	24.5	0.19
Scaffold_98	SBWMV1_UPD-PKe	RF01081	cm	1	26	42350	42403	-	no	1	0.52	0	19.4	12
Scaffold_99	snoU43C	RF01154	cm	1	66	20151	20205	-	no	1	0.27	0	20.3	35
Scaffold_99	PK1-TEV_CVMV	RF01102	cm	1	37	66220	66256	+	no	1	0.38	0	23.4	3.7
Scaffold_99	S_pombe_snR97	RF01451	cm	103	124	90627	90648	-	no	1	0.18	0	8.3	6200
Scaffold_99	snoZ185	RF00320	cm	1	86	112891	112969	+	no	1	0.43	0	21	0.88

## Sheet: B) Infernal-Summary
Non-coding RNA determined by Infernal vs RFAM (e-value <= 0.05)
miRNA	108
mir-944	24
mir-876	9
mir-529	5
mir-503	4
mir-203	3
mir-450	3
mir-577	3
snRNA	37
U2	7
U4	2
U5	3
U6	8
tRNA	84
Other	10

## Sheet: C) tRNAScan-SE-COVEonly
tRNAscan-SE v.1.23 summary
Sequence		tRNA	Bounds	tRNA	Anti	Intron Bounds	Cove
Name	tRNA #	Begin	End	Type	Codon	Begin	End	Score
--------	------	----	------	----	-----	-----	----	------
Scaffold_1	1	745262	745345	Val	AAC	745300	745309	37.26
Scaffold_1	2	1081667	1081765	His	GTG	1081704	1081730	49.77
Scaffold_1	3	274643	274565	Arg	CCG	274607	274601	51.09
Scaffold_2	1	837224	837137	Arg	TCT	837188	837173	54.74
Scaffold_2	2	342050	341944	Ile	TAT	342014	341980	56.34
Scaffold_3	1	801554	801458	Asn	GTT	801517	801494	58.26
Scaffold_3	2	800404	800308	Asn	GTT	800367	800344	58.26
Scaffold_3	3	384790	384719	Thr	AGT	0	0	70.61
Scaffold_4	1	180307	180211	Ser	CGA	180270	180256	57.16
Scaffold_5	1	259669	259785	Leu	CAA	259707	259739	48.61
Scaffold_6	1	80414	80518	Thr	TGT	80450	80482	62.97
Scaffold_6	2	682176	682277	His	GTG	682213	682242	47.16
Scaffold_7	1	115102	115196	Leu	TAA	115139	115151	52
Scaffold_7	2	117556	117650	Leu	TAA	117593	117605	52
Scaffold_7	3	402626	402544	Gln	TTG	402589	402579	55.77
Scaffold_7	4	278887	278773	Gly	TCC	278850	278808	59.27
Scaffold_8	1	150102	150182	Cys	GCA	150138	150146	56.73
Scaffold_8	2	574617	574717	Leu	AAG	574655	574675	57.89
Scaffold_11	1	377251	377168	Gly	GCC	377215	377203	49.84
Scaffold_12	1	274806	274877	Glu	CTC	0	0	61.73
Scaffold_12	2	295548	295450	Thr	CGT	295512	295486	60.47
Scaffold_12	3	88500	88406	Pro	TGG	88464	88442	52.83
Scaffold_14	1	84471	84542	Glu	TTC	0	0	58.24
Scaffold_14	2	295091	294989	Ala	AGC	295054	295025	63.34
Scaffold_17	1	271212	271140	Phe	GAA	0	0	63.1
Scaffold_21	1	48046	47940	Ala	AGC	48009	47976	58.41
Scaffold_22	1	113284	113365	Ser	AGA	0	0	62.09
Scaffold_22	2	42871	42775	Leu	CAG	42833	42822	50.91
Scaffold_26	1	20874	20788	Ile	AAT	20836	20824	53.33
Scaffold_27	1	37606	37707	Cys	GCA	37642	37671	51.85
Scaffold_27	2	69310	69382	Phe	GAA	0	0	30.73
Scaffold_27	3	168839	168931	Gly	GCC	168875	168896	43.45
Scaffold_29	1	172086	171976	Leu	CAA	172048	172022	52.97
Scaffold_30	1	110965	110883	Pro	AGG	110929	110919	41.98
Scaffold_30	2	109688	109606	Pro	AGG	109652	109642	41.98
Scaffold_31	1	126876	126774	Gly	CCC	126839	126809	39.63
Scaffold_32	1	210317	210412	Asn	GTT	210354	210376	57.94
Scaffold_37	1	119381	119485	Gly	CCC	119418	119450	53.79
Scaffold_37	2	120630	120734	Gly	CCC	120667	120699	53.79
Scaffold_37	3	173111	173009	Ser	TGA	173074	173054	54.07
Scaffold_39	1	123649	123737	Tyr	GTA	123686	123701	58.93
Scaffold_41	1	117150	117063	Ile	AAT	117112	117099	51.87
Scaffold_47	1	50268	50160	Arg	TCG	50231	50196	51.05
Scaffold_49	1	76940	77022	Val	AAC	76978	76986	43.76
Scaffold_50	1	15875	15957	Asp	GTC	15912	15922	45.8
Scaffold_50	2	37412	37494	Asp	GTC	37449	37459	44.19
Scaffold_50	3	38207	38291	Gly	GCC	38243	38256	50.07
Scaffold_50	4	16324	16242	Asp	GTC	16287	16277	45.8
Scaffold_51	1	52931	52860	Glu	CTC	0	0	61.73
Scaffold_52	1	92139	92219	Arg	ACG	92175	92183	52.75
Scaffold_52	2	175873	175953	Arg	ACG	175909	175917	52.9
Scaffold_54	1	82859	82777	Trp	CCA	82823	82813	44.58
Scaffold_56	1	75735	75815	Lys	CTT	75772	75779	59.11
Scaffold_56	2	76305	76385	Lys	CTT	76342	76349	59.11
Scaffold_56	3	117853	117933	Lys	CTT	117890	117897	59.11
Scaffold_56	4	104309	104229	Lys	CTT	104272	104265	59.11
Scaffold_56	5	11351	11269	Val	AAC	11313	11305	53.27
Scaffold_58	1	131803	131883	Pseudo	ACG	131838	131847	21.7
Scaffold_58	2	131884	131965	Arg	ACG	131920	131929	54.27
Scaffold_60	1	73346	73253	Ser	GCT	73309	73298	44.11
Scaffold_85	1	128952	128849	Lys	TTT	128915	128885	56.48
Scaffold_89	1	89913	90006	Thr	CGT	89949	89970	58.55
Scaffold_91	1	17346	17259	Lys	CTT	17309	17295	30.57
Scaffold_92	1	97815	97886	Glu	CTC	0	0	61.73
Scaffold_93	1	15344	15429	Trp	CCA	15380	15393	52.47
Scaffold_94	1	67777	67893	Lys	TTT	67814	67857	58.58
Scaffold_109	1	3721	3822	His	GTG	3758	3787	47.99
Scaffold_111	1	24283	24369	Ala	AGC	24320	24333	38.07
Scaffold_111	2	25855	25941	Ala	AGC	25892	25905	28.03
Scaffold_129	1	63065	63168	Ala	AGC	63102	63132	56.81
Scaffold_132	1	47312	47241	Glu	CTC	0	0	61.73
Scaffold_137	1	55923	55851	Phe	GAA	0	0	64.69
Scaffold_139	1	18392	18491	Phe	GAA	18429	18455	52.89
Scaffold_146	1	40436	40555	Gln	CTG	40473	40520	49.35
Scaffold_146	2	30661	30579	Gln	CTG	30624	30614	55.6
Scaffold_154	1	6552	6631	Ala	TGC	6588	6595	60.12
Scaffold_154	2	7294	7373	Ala	TGC	7330	7337	61.02
Scaffold_163	1	8092	7995	Leu	AAG	8054	8037	57.75
Scaffold_166	1	70312	70227	Val	TAC	70275	70263	43.42
Scaffold_180	1	39481	39563	Val	AAC	39519	39527	53.27
Scaffold_180	2	42070	41991	Val	AAC	42032	42027	53.81
Scaffold_182	1	22025	22107	Asp	GTC	22062	22072	43
Scaffold_189	1	48669	48748	Ala	CGC	48706	48712	49.29
Scaffold_205	1	7484	7566	Val	AAC	7522	7530	53.13
Scaffold_218	1	36479	36386	Ser	GCT	36442	36431	44.25
Scaffold_259	1	9877	9957	Arg	ACG	9913	9921	54.09
Scaffold_324	1	408	503	Asn	GTT	445	467	57.79
Scaffold_324	2	1239	1334	Asn	GTT	1276	1298	57.2
Scaffold_328	1	12801	12730	Thr	AGT	0	0	70.61
Scaffold_328	2	11834	11763	Thr	AGT	0	0	70.61
Scaffold_346	1	8964	9064	Pro	CGG	9000	9028	42.11
Scaffold_651	1	1979	2051	Lys	CTT	2012	2019	36.11
Scaffold_660	1	169	97	Glu	TTC	0	0	56.17
Scaffold_871	1	685	787	Gly	CCC	722	752	40.23
